# Supplementary material
Source: PubMed Central journal article supplement (PMC6140508)
Supplement: pnas.1804179115.sapp.pdf [file pnas.1804179115.sapp.pdf]

## Supporting information

### *Additional analyses.*

#### *Autocovariate regression*

As an alternative approach to the GLMMs to account for possible spatial autocorrelation in model residuals<sup>1</sup>, we modelled alien and native species numbers using generalized linear models (GLMs) including a spatial autocovariate based on the residuals of the corresponding non-spatial model<sup>2</sup>. Autocovariate terms were calculated using the function *autocov\_dist* from the R-package *spdep*<sup>3</sup>. The appropriate neighbourhood distances (1000 km for plants, ants, reptiles; and 2000 km for mammals; e.g. Weigelt *et al.*<sup>4</sup>) were identified by plotting spline (cross-) correlograms using the function *spline.correlog* from the package *ncf*<sup>5</sup>. Since these models showed signs of overdispersion, we used quasi-Poisson GLMs with the canonical log link function. The results of these autocovariate regressions match the results of the GLMMs showing even a higher significance for distance to the mainland for ants, mammals and particularly for reptiles (see Table S6). For alien birds the models could not be accepted following visual inspection of the model diagnostics. Therefore, we decided to exclude the autocovariate regression for birds.

#### *Commodity imports and distance*

It was not possible to obtain robust data on imported commodities for all the islands considered in the study. Thus, we analysed the effect of isolation on commodity imports for a subset of islands for which trade statistics were available from the Worldbank database<sup>6</sup>. The Worldbank data comprise information for the years 1988 onwards and for different commodity classes. In the analysis reported here, we used data for the year 2006 and including all commodity classes as it provided the most complete dataset including 31 islands and archipelagos (see Table S8). To analyse the effect of isolation on the amount of imports we applied a linear regression of log-transformed import values of all products as response against the distance to mainland and island area. To account for possible spatial autocorrelation in the model residuals<sup>1</sup>, we included a spatial autocovariate based on the residuals of the corresponding non-spatial model<sup>2</sup>. The autocovariate term was calculated

using the function *autocov\_dist* from the R-package *spdep*<sup>3</sup>. The appropriate neighbourhood distance (1500 km) was identified by plotting spline (cross-) correlograms using the function *spline.correlog* from the package *ncf*<sup>5</sup>. To improve symmetry, linearity, and to stabilize variances, predictor variables were log-transformed and standardised prior to analyses. The results (Table S7) revealed a highly significant positive effect of area and a highly significant negative effect of distance. Hence, the Worldbank data provide evidence that the value of imports decreases significantly with increasing isolation of islands. These results were consistent for all other product classifications and years.

**Table S1a: Generalized linear mixed effects models (GLMMs) of regressing species richness (either established alien, native or native + established alien species) against six predictor variables.**

|                                    | Aliens                            |                |                  | Natives                            |                |                  | Native + alien                     |                |                |
|------------------------------------|-----------------------------------|----------------|------------------|------------------------------------|----------------|------------------|------------------------------------|----------------|----------------|
|                                    | <i>Coefficient</i> ( $\pm$ SE)    | <i>z-value</i> | <i>p-value</i>   | <i>Coefficient</i> ( $\pm$ SE)     | <i>z-value</i> | <i>p-value</i>   | <i>Coefficient</i> ( $\pm$ SE)     | <i>z-value</i> | <i>p-value</i> |
| <b>Vascular plants</b>             |                                   |                |                  |                                    |                |                  |                                    |                |                |
| <i>Intercept</i>                   | 4.75( $\pm$ 0.07)                 | 70.79          | <0.001           | 5.22( $\pm$ 0.09)                  | 58.20          | <0.001           | 5.89( $\pm$ 0.07)                  | 85.02          | <0.001         |
| <b><i>Distance to mainland</i></b> | <b>0.47(<math>\pm</math>0.08)</b> | <b>5.64</b>    | <b>&lt;0.001</b> | <b>-0.49(<math>\pm</math>0.09)</b> | <b>-5.46</b>   | <b>&lt;0.001</b> | <b>-0.17(<math>\pm</math>0.07)</b> | <b>-2.34</b>   | <b>0.019</b>   |
| <i>Island area</i>                 | 0.68( $\pm$ 0.10)                 | 6.89           | <0.001           | 0.83( $\pm$ 0.07)                  | 11.59          | <0.001           | 0.80( $\pm$ 0.07)                  | 11.86          | <0.001         |
| <i>Elevational range</i>           | 0.23( $\pm$ 0.09)                 | 2.44           | 0.015            | 0.36( $\pm$ 0.09)                  | 4.12           | <0.001           | 0.31( $\pm$ 0.08)                  | 4.10           | <0.001         |
| <i>Mean annual temp.</i>           | -0.13( $\pm$ 0.08)                | -1.69          | 0.091            | -0.05( $\pm$ 0.07)                 | -0.70          | 0.487            | -0.05( $\pm$ 0.06)                 | -0.87          | 0.384          |
| <i>Annual prec. sum</i>            | -0.03( $\pm$ 0.07)                | -0.47          | 0.639            | 0.35( $\pm$ 0.07)                  | 5.25           | <0.001           | 0.25( $\pm$ 0.06)                  | 4.48           | <0.001         |
| <i>Per-capita GDP</i>              | 0.45( $\pm$ 0.07)                 | 6.14           | <0.001           | 0.08( $\pm$ 0.05)                  | 1.58           | 0.115            | 0.21( $\pm$ 0.05)                  | 4.50           | <0.001         |
| <b>Ants</b>                        |                                   |                |                  |                                    |                |                  |                                    |                |                |
| <i>Intercept</i>                   | 2.64( $\pm$ 0.08)                 | 33.95          | <0.001           | 2.83( $\pm$ 0.26)                  | 10.80          | <0.001           | 3.78( $\pm$ 0.25)                  | 15.41          | <0.001         |
| <b><i>Distance to mainland</i></b> | <b>0.27(<math>\pm</math>0.08)</b> | <b>3.46</b>    | <b>0.001</b>     | <b>-0.57(<math>\pm</math>0.14)</b> | <b>-4.15</b>   | <b>&lt;0.001</b> | <b>-0.05(<math>\pm</math>0.09)</b> | <b>-0.59</b>   | <b>0.554</b>   |
| <i>Island area</i>                 | 0.28( $\pm$ 0.09)                 | 3.05           | 0.002            | 0.92( $\pm$ 0.15)                  | 5.95           | <0.001           | 0.64( $\pm$ 0.11)                  | 6.05           | <0.001         |
| <i>Elevational range</i>           | 0.21( $\pm$ 0.10)                 | 2.03           | 0.042            | 0.16( $\pm$ 0.17)                  | 0.93           | 0.350            | 0.16( $\pm$ 0.11)                  | 1.43           | 0.153          |
| <i>Mean annual temp.</i>           | 0.01( $\pm$ 0.08)                 | 0.09           | 0.929            | 0.22( $\pm$ 0.13)                  | 1.63           | 0.104            | 0.02( $\pm$ 0.08)                  | 0.24           | 0.811          |
| <i>Annual prec. sum</i>            | 0.07( $\pm$ 0.07)                 | 0.97           | 0.333            | 0.43( $\pm$ 0.12)                  | 3.53           | <0.001           | 0.26( $\pm$ 0.08)                  | 3.41           | 0.001          |
| <i>Per-capita GDP</i>              | 0.20( $\pm$ 0.06)                 | 3.14           | 0.002            | 0.13( $\pm$ 0.11)                  | 1.17           | 0.241            | 0.10( $\pm$ 0.07)                  | 1.40           | 0.162          |
| <b>Mammals</b>                     |                                   |                |                  |                                    |                |                  |                                    |                |                |
| <i>Intercept</i>                   | 1.54( $\pm$ 0.07)                 | 22.72          | <0.001           | 0.74( $\pm$ 0.15)                  | 4.84           | <0.001           | 2.03( $\pm$ 0.08)                  | 25.38          | <0.001         |
| <b><i>Distance to mainland</i></b> | <b>0.14(<math>\pm</math>0.06)</b> | <b>2.25</b>    | <b>0.024</b>     | <b>-0.48(<math>\pm</math>0.11)</b> | <b>-4.33</b>   | <b>&lt;0.001</b> | <b>-0.18(<math>\pm</math>0.06)</b> | <b>-2.96</b>   | <b>0.003</b>   |
| <i>Island area</i>                 | 0.42( $\pm$ 0.09)                 | 4.80           | <0.001           | 0.66( $\pm$ 0.10)                  | 6.92           | <0.001           | 0.59( $\pm$ 0.07)                  | 8.11           | <0.001         |
| <i>Elevational range</i>           | 0.21( $\pm$ 0.11)                 | 1.98           | 0.048            | 0.29( $\pm$ 0.13)                  | 2.23           | 0.025            | 0.19( $\pm$ 0.09)                  | 2.19           | 0.029          |
| <i>Mean annual temp.</i>           | 0.10( $\pm$ 0.07)                 | 1.35           | 0.175            | 0.13( $\pm$ 0.11)                  | 1.10           | 0.273            | 0.12( $\pm$ 0.07)                  | 1.73           | 0.084          |
| <i>Annual prec. sum</i>            | 0.02( $\pm$ 0.06)                 | 0.36           | 0.722            | 0.08( $\pm$ 0.09)                  | 0.89           | 0.371            | 0.05( $\pm$ 0.06)                  | 0.92           | 0.355          |
| <i>Per-capita GDP</i>              | 0.23( $\pm$ 0.06)                 | 3.96           | <0.001           | 0.10( $\pm$ 0.07)                  | 1.37           | 0.169            | 0.20( $\pm$ 0.05)                  | 3.97           | <0.001         |
| <b>Reptiles</b>                    |                                   |                |                  |                                    |                |                  |                                    |                |                |
| <i>Intercept</i>                   | 1.11( $\pm$ 0.12)                 | 9.52           | <0.001           | 2.65( $\pm$ 0.11)                  | 24.08          | <0.001           | 2.95( $\pm$ 0.07)                  | 42.36          | <0.001         |
| <b><i>Distance to mainland</i></b> | <b>0.22(<math>\pm</math>0.11)</b> | <b>1.97</b>    | <b>0.049</b>     | <b>-0.25(<math>\pm</math>0.10)</b> | <b>-2.64</b>   | <b>0.008</b>     | <b>-0.08(<math>\pm</math>0.07)</b> | <b>-1.22</b>   | <b>0.222</b>   |
| <i>Island area</i>                 | 0.33( $\pm$ 0.14)                 | 2.36           | 0.018            | 0.70( $\pm$ 0.10)                  | 7.01           | <0.001           | 0.68( $\pm$ 0.08)                  | 8.48           | <0.001         |
| <i>Elevational range</i>           | 0.06( $\pm$ 0.15)                 | 0.41           | 0.682            | 0.08( $\pm$ 0.10)                  | 0.78           | 0.435            | 0.07( $\pm$ 0.08)                  | 0.85           | 0.393          |
| <i>Mean annual temp.</i>           | -0.08( $\pm$ 0.11)                | -0.72          | 0.473            | 0.37( $\pm$ 0.09)                  | 4.09           | <0.001           | 0.21( $\pm$ 0.07)                  | 3.15           | 0.002          |
| <i>Annual prec. sum</i>            | 0.11( $\pm$ 0.11)                 | 1.03           | 0.304            | 0.01( $\pm$ 0.08)                  | 0.07           | 0.944            | 0.06( $\pm$ 0.06)                  | 0.99           | 0.322          |
| <i>Per-capita GDP</i>              | 0.27( $\pm$ 0.09)                 | 3.08           | 0.002            | -0.01( $\pm$ 0.06)                 | -0.17          | 0.863            | 0.07( $\pm$ 0.05)                  | 1.37           | 0.170          |
| <b>Birds</b>                       |                                   |                |                  |                                    |                |                  |                                    |                |                |
| <i>Intercept</i>                   | 1.57( $\pm$ 0.12)                 | 13.09          | <0.001           | 4.21( $\pm$ 0.13)                  | 31.38          | <0.001           | 4.32( $\pm$ 0.12)                  | 35.37          | <0.001         |

|                             |                    |             |              |                     |              |                  |                     |              |                  |
|-----------------------------|--------------------|-------------|--------------|---------------------|--------------|------------------|---------------------|--------------|------------------|
| <i>Distance to mainland</i> | <b>0.08(±0.13)</b> | <b>0.58</b> | <b>0.564</b> | <b>-0.32(±0.07)</b> | <b>-4.61</b> | <b>&lt;0.001</b> | <b>-0.25(±0.06)</b> | <b>-4.18</b> | <b>&lt;0.001</b> |
| <i>Island area</i>          | 0.65(±0.13)        | 4.88        | <0.001       | 0.37(±0.06)         | 6.38         | <0.001           | 0.43(±0.05)         | 7.95         | <0.001           |
| <i>Elevational range</i>    | -0.12(±0.12)       | -0.99       | 0.321        | 0.02(±0.05)         | 0.47         | 0.638            | 0.01(±0.05)         | 0.11         | 0.912            |
| <i>Mean annual temp.</i>    | -0.31(±0.09)       | -3.29       | 0.001        | 0.08(±0.05)         | 1.81         | 0.070            | 0.01(±0.04)         | 0.37         | 0.711            |
| <i>Annual prec. sum</i>     | 0.07(±0.10)        | 0.73        | 0.465        | 0.09(±0.04)         | 2.15         | 0.031            | 0.09(±0.04)         | 2.30         | 0.022            |
| <i>Per-capita GDP</i>       | 0.23(±0.08)        | 2.76        | 0.006        | -0.01(±0.03)        | -0.43        | 0.667            | 0.02(±0.03)         | 0.69         | 0.491            |

**Table S1b: Generalized linear mixed effects models (GLMMs) of regressing species richness (either alien, native or native + alien species) against six predictor variables. Distance to mainland includes main islands of Malay Archipelago.**

|                                    | Alien                    |                |                  | Native                   |                |                  | Native + alien           |                |                |
|------------------------------------|--------------------------|----------------|------------------|--------------------------|----------------|------------------|--------------------------|----------------|----------------|
| <i>Vascular plants</i>             | <i>Coefficient (±SE)</i> | <i>z-value</i> | <i>p-value</i>   | <i>Coefficient (±SE)</i> | <i>z-value</i> | <i>p-value</i>   | <i>Coefficient (±SE)</i> | <i>z-value</i> | <i>p-value</i> |
| <i>Intercept</i>                   | 4.75(±0.07)              | 71.48          | <0.001           | 5.21(±0.09)              | 57.49          | <0.001           | 5.89(±0.07)              | 86.08          | <0.001         |
| <b><i>Distance to mainland</i></b> | <b>0.47(±0.08)</b>       | <b>5.66</b>    | <b>&lt;0.001</b> | <b>-0.48(±0.09)</b>      | <b>-5.37</b>   | <b>&lt;0.001</b> | <b>-0.16(±0.07)</b>      | <b>-2.29</b>   | <b>0.022</b>   |
| <i>Island area</i>                 | 0.68(±0.10)              | 6.98           | <0.001           | 0.84(±0.07)              | 11.65          | <0.001           | 0.80(±0.07)              | 11.89          | <0.001         |
| <i>Elevational range</i>           | 0.23(±0.09)              | 2.45           | 0.014            | 0.35(±0.09)              | 3.98           | <0.001           | 0.31(±0.08)              | 4.05           | <0.001         |
| <i>Mean annual temp.</i>           | -0.12(±0.07)             | -1.60          | 0.110            | -0.06(±0.07)             | -0.81          | 0.419            | -0.05(±0.06)             | -0.89          | 0.374          |
| <i>Annual prec. sum</i>            | -0.03(±0.07)             | -0.40          | 0.687            | 0.34(±0.07)              | 5.18           | <0.001           | 0.25(±0.06)              | 4.50           | <0.001         |
| <i>Per-capita GDP</i>              | 0.45(±0.07)              | 6.18           | <0.001           | 0.08(±0.05)              | 1.57           | 0.116            | 0.21(±0.05)              | 4.48           | <0.001         |
| <b>Ants</b>                        |                          |                |                  |                          |                |                  |                          |                |                |
| <i>Intercept</i>                   | 2.63(±0.07)              | 35.21          | <0.001           | 2.83(±0.26)              | 11.07          | <0.001           | 3.78(±0.24)              | 15.59          | <0.001         |
| <b><i>Distance to mainland</i></b> | <b>0.28(±0.08)</b>       | <b>3.61</b>    | <b>&lt;0.001</b> | <b>-0.62(±0.14)</b>      | <b>-4.45</b>   | <b>&lt;0.001</b> | <b>-0.07(±0.09)</b>      | <b>-0.78</b>   | <b>0.438</b>   |
| <i>Island area</i>                 | 0.29(±0.09)              | 3.12           | 0.002            | 0.89(±0.15)              | 5.92           | <0.001           | 0.63(±0.11)              | 5.99           | <0.001         |
| <i>Elevational range</i>           | 0.21(±0.10)              | 2.00           | 0.045            | 0.17(±0.16)              | 1.08           | 0.280            | 0.16(±0.11)              | 1.43           | 0.153          |
| <i>Mean annual temp.</i>           | 0.01(±0.07)              | 0.17           | 0.869            | 0.20(±0.13)              | 1.56           | 0.120            | 0.02(±0.08)              | 0.20           | 0.844          |
| <i>Annual prec. sum</i>            | 0.08(±0.07)              | 1.11           | 0.265            | 0.41(±0.12)              | 3.51           | <0.001           | 0.26(±0.08)              | 3.46           | 0.001          |
| <i>Per-capita GDP</i>              | 0.20(±0.06)              | 3.20           | 0.001            | 0.12(±0.11)              | 1.13           | 0.259            | 0.10(±0.07)              | 1.39           | 0.164          |
| <b>Mammals</b>                     |                          |                |                  |                          |                |                  |                          |                |                |
| <i>Intercept</i>                   | 1.54(±0.07)              | 22.42          | <0.001           | 0.68(±0.18)              | 3.87           | <0.001           | 2.02(±0.08)              | 24.26          | <0.001         |
| <b><i>Distance to mainland</i></b> | <b>0.13(±0.06)</b>       | <b>2.06</b>    | <b>0.040</b>     | <b>-0.32(±0.13)</b>      | <b>-2.54</b>   | <b>0.011</b>     | <b>-0.15(±0.06)</b>      | <b>-2.35</b>   | <b>0.019</b>   |
| <i>Island area</i>                 | 0.43(±0.09)              | 4.58           | <0.001           | 0.74(±0.10)              | 7.65           | <0.001           | 0.61(±0.07)              | 8.64           | <0.001         |
| <i>Elevational range</i>           | 0.19(±0.11)              | 1.64           | 0.100            | 0.31(±0.13)              | 2.34           | 0.019            | 0.19(±0.09)              | 2.14           | 0.033          |
| <i>Mean annual temp.</i>           | 0.10(±0.07)              | 1.28           | 0.201            | 0.20(±0.12)              | 1.67           | 0.096            | 0.14(±0.07)              | 1.93           | 0.053          |
| <i>Annual prec. sum</i>            | 0.02(±0.06)              | 0.39           | 0.694            | 0.02(±0.09)              | 0.26           | 0.793            | 0.03(±0.06)              | 0.53           | 0.600          |
| <i>Per-capita GDP</i>              | 0.22(±0.06)              | 3.95           | <0.001           | 0.07(±0.08)              | 0.89           | 0.375            | 0.18(±0.05)              | 3.70           | <0.001         |
| <b>Reptiles</b>                    |                          |                |                  |                          |                |                  |                          |                |                |
| <i>Intercept</i>                   | 1.11(±0.12)              | 9.58           | <0.001           | 2.64(±0.11)              | 24.54          | <0.001           | 2.95(±0.07)              | 42.91          | <0.001         |

|                                    |                    |             |              |                     |              |                  |                     |              |                  |
|------------------------------------|--------------------|-------------|--------------|---------------------|--------------|------------------|---------------------|--------------|------------------|
| <b><i>Distance to mainland</i></b> | <b>0.19(±0.11)</b> | <b>1.77</b> | <b>0.078</b> | <b>-0.27(±0.09)</b> | <b>-2.91</b> | <b>0.004</b>     | <b>-0.10(±0.07)</b> | <b>-1.58</b> | <b>0.115</b>     |
| <i>Island area</i>                 | 0.32(±0.14)        | 2.28        | 0.023        | 0.70(±0.10)         | 7.10         | <0.001           | 0.68(±0.08)         | 8.50         | <0.001           |
| <i>Elevational range</i>           | 0.07(±0.15)        | 0.45        | 0.655        | 0.07(±0.10)         | 0.72         | 0.471            | 0.06(±0.08)         | 0.80         | 0.422            |
| <i>Mean annual temp.</i>           | -0.07(±0.11)       | -0.68       | 0.497        | 0.36(±0.09)         | 3.96         | <0.001           | 0.21(±0.07)         | 3.02         | 0.002            |
| <i>Annual prec. sum</i>            | 0.13(±0.10)        | 1.24        | 0.214        | 0.00(±0.08)         | 0.01         | 0.989            | 0.06(±0.06)         | 1.08         | 0.282            |
| <i>Per-capita GDP</i>              | 0.27(±0.09)        | 3.13        | 0.002        | -0.02(±0.06)        | -0.28        | 0.777            | 0.06(±0.05)         | 1.32         | 0.186            |
| <b>Birds</b>                       |                    |             |              |                     |              |                  |                     |              |                  |
| <i>Intercept</i>                   | 1.57(±0.12)        | 13.10       | <0.001       | 4.20(±0.13)         | 33.16        | <0.001           | 4.31(±0.12)         | 36.97        | <0.001           |
| <b><i>Distance to mainland</i></b> | <b>0.08(±0.13)</b> | <b>0.62</b> | <b>0.538</b> | <b>-0.35(±0.07)</b> | <b>-4.99</b> | <b>&lt;0.001</b> | <b>-0.28(±0.06)</b> | <b>-4.51</b> | <b>&lt;0.001</b> |
| <i>Island area</i>                 | 0.65(±0.13)        | 4.86        | <0.001       | 0.35(±0.06)         | 6.02         | <0.001           | 0.40(±0.05)         | 7.60         | <0.001           |
| <i>Elevational range</i>           | -0.12(±0.12)       | -1.00       | 0.316        | 0.04(±0.05)         | 0.70         | 0.482            | 0.01(±0.05)         | 0.30         | 0.762            |
| <i>Mean annual temp.</i>           | -0.31(±0.09)       | -3.27       | 0.001        | 0.08(±0.04)         | 1.76         | 0.078            | 0.01(±0.04)         | 0.30         | 0.766            |
| <i>Annual prec. sum</i>            | 0.07(±0.10)        | 0.76        | 0.445        | 0.08(±0.04)         | 1.89         | 0.059            | 0.08(±0.04)         | 2.08         | 0.038            |
| <i>Per-capita GDP</i>              | 0.23(±0.08)        | 2.74        | 0.006        | -0.01(±0.03)        | -0.34        | 0.735            | 0.02(±0.03)         | 0.79         | 0.432            |

**Table S1c: Generalized linear mixed effects models (GLMMs) of species richness of all introduced birds on 87 islands in response to six predictor variables.**

|                                    | <b>All introduced alien birds</b> |                |                |
|------------------------------------|-----------------------------------|----------------|----------------|
|                                    | <i>Coefficient (±SE)</i>          | <i>z-value</i> | <i>p-value</i> |
| <i>Intercept</i>                   | 2.02(±0.12)                       | 17.22          | <0.001         |
| <b><i>Distance to mainland</i></b> | <b>0.12(±0.14)</b>                | <b>0.86</b>    | <b>0.388</b>   |
| <i>Island area</i>                 | 0.74(±0.15)                       | 4.98           | <0.001         |
| <i>Elevational range</i>           | -0.18(±0.13)                      | -1.35          | 0.178          |
| <i>Mean annual temp.</i>           | -0.34(±0.1)                       | -3.31          | 0.001          |
| <i>Annual prec. sum</i>            | -0.10(±0.11)                      | -0.89          | 0.372          |
| <i>Per-capita GDP</i>              | 0.30(±0.09)                       | 3.27           | 0.001          |

**Table S2. Sensitivity analysis for the dependence of alien richness on island isolation in a multiple regression framework.** Coefficients (95% confidence interval of 500 repeated runs) are reported for the richness isolation relationship when a given geographic region (based on TDWG level 2 classification) or less reliable sources have been excluded from the analysis. Excl. show the region excluded, N excl. gives the number of islands/sources excluded. For a more detailed description of the sensitivity analysis, see the methods section.

|                              | <i>Excl.</i> | <i>N excl.</i> | <i>Coefficient</i> |              |
|------------------------------|--------------|----------------|--------------------|--------------|
|                              |              |                | <i>2.5%</i>        | <i>97.5%</i> |
| <b>Vascular plants</b>       |              |                |                    |              |
| Australia                    |              | 2              | 0.47               | 0.47         |
| Brazil                       |              | 2              | 0.47               | 0.47         |
| Caribbean                    |              | 18             | 0.41               | 0.42         |
| Eastern Asia                 |              | 3              | 0.46               | 0.46         |
| Macaronesia                  |              | 2              | 0.46               | 0.46         |
| Malesia                      |              | 2              | 0.46               | 0.46         |
| Mexico                       |              | 2              | 0.45               | 0.45         |
| Middle Atlantic Ocean        |              | 2              | 0.47               | 0.47         |
| New Zealand                  |              | 1              | 0.46               | 0.46         |
| North-Central Pacific        |              | 3              | 0.47               | 0.47         |
| Northwestern Pacific         |              | 18             | 0.45               | 0.46         |
| Papuasias                    |              | 1              | 0.47               | 0.47         |
| South-Central Pacific        |              | 22             | 0.54               | 0.55         |
| Southwestern Pacific         |              | 19             | 0.47               | 0.47         |
| West-Central Tropical Africa |              | 2              | 0.43               | 0.43         |
| Western Asia                 |              | 1              | 0.46               | 0.46         |
| Western Indian Ocean         |              | 8              | 0.47               | 0.47         |
| Western South America        |              | 1              | 0.47               | 0.47         |
| Source                       |              | 1              | 0.46               | 0.47         |
| <b>Ants</b>                  |              |                |                    |              |
| Brazil                       |              | 1              | 0.26               | 0.27         |
| Caribbean                    |              | 22             | 0.33               | 0.36         |
| Eastern Asia                 |              | 3              | 0.26               | 0.27         |
| Macaronesia                  |              | 2              | 0.27               | 0.28         |
| Malesia                      |              | 8              | 0.25               | 0.27         |
| Mexico                       |              | 2              | 0.25               | 0.26         |
| Middle Atlantic Ocean        |              | 2              | 0.27               | 0.28         |
| New Zealand                  |              | 1              | 0.26               | 0.27         |
| North-Central Pacific        |              | 3              | 0.25               | 0.26         |
| Northeast Tropical Africa    |              | 1              | 0.26               | 0.27         |
| Northwestern Pacific         |              | 7              | 0.27               | 0.29         |
| Papuasias                    |              | 2              | 0.26               | 0.27         |
| South-Central Pacific        |              | 10             | 0.31               | 0.33         |
| Southwestern Pacific         |              | 11             | 0.26               | 0.28         |
| West-Central Tropical Africa |              | 1              | 0.23               | 0.24         |
| Western Indian Ocean         |              | 11             | 0.24               | 0.26         |
| Western South America        |              | 2              | 0.26               | 0.27         |
| Source                       |              | 0              | -                  | -            |
| <b>Mammals</b>               |              |                |                    |              |
| Australia                    |              | 6              | 0.10               | 0.12         |
| Caribbean                    |              | 56             | 0.13               | 0.15         |
| Macaronesia                  |              | 9              | 0.15               | 0.18         |



|                              |    |      |      |
|------------------------------|----|------|------|
| Malesia                      | 2  | 0.14 | 0.15 |
| Mexico                       | 1  | 0.14 | 0.14 |
| Middle Atlantic Ocean        | 2  | 0.13 | 0.14 |
| North-Central Pacific        | 9  | 0.15 | 0.16 |
| Northeast Tropical Africa    | 1  | 0.14 | 0.14 |
| Northwestern Pacific         | 3  | 0.13 | 0.14 |
| Papuasias                    | 3  | 0.14 | 0.15 |
| South-Central Pacific        | 8  | 0.11 | 0.13 |
| Southwestern Pacific         | 5  | 0.16 | 0.18 |
| West-Central Tropical Africa | 1  | 0.16 | 0.17 |
| Western Indian Ocean         | 5  | 0.10 | 0.11 |
| Western South America        | 14 | 0.13 | 0.15 |
| Source                       | 1  | 0.14 | 0.14 |

**Reptiles**

|                              |    |      |      |
|------------------------------|----|------|------|
| Arabian Peninsula            | 1  | 0.20 | 0.22 |
| Brazil                       | 1  | 0.22 | 0.24 |
| Caribbean                    | 30 | 0.31 | 0.36 |
| Eastern Asia                 | 1  | 0.20 | 0.22 |
| Macaronesia                  | 2  | 0.21 | 0.24 |
| Malesia                      | 3  | 0.20 | 0.23 |
| Mexico                       | 1  | 0.20 | 0.22 |
| Middle Atlantic Ocean        | 2  | 0.19 | 0.22 |
| North-Central Pacific        | 1  | 0.15 | 0.18 |
| Northeast Tropical Africa    | 1  | 0.21 | 0.23 |
| Northwestern Pacific         | 5  | 0.17 | 0.21 |
| Papuasias                    | 1  | 0.20 | 0.23 |
| South-Central Pacific        | 3  | 0.17 | 0.21 |
| Southwestern Pacific         | 12 | 0.24 | 0.29 |
| West-Central Tropical Africa | 3  | 0.16 | 0.19 |
| Western Indian Ocean         | 7  | 0.20 | 0.25 |
| Western South America        | 1  | 0.21 | 0.23 |
| Source                       | 3  | 0.22 | 0.27 |

**Table S3. Data sources for the predictor variables used in regression analyses.**

| <b>Predictor</b>                        | <b>Source(s)</b>                                                                                         |
|-----------------------------------------|----------------------------------------------------------------------------------------------------------|
| <i>Socio-economic</i>                   |                                                                                                          |
| Per capita gross domestic product (GDP) | Worldbank <sup>6</sup> ; United Nations Statistics Division <sup>8</sup> ; Gennaioli et al. <sup>9</sup> |
| Human population density                | HYDE-database <sup>10</sup>                                                                              |
| <i>Climatic</i>                         |                                                                                                          |
| Mean annual temperature                 | WorldClim: <sup>11</sup>                                                                                 |
| Mean annual precipitation sum           | WorldClim: <sup>11</sup>                                                                                 |
| <i>Environmental</i>                    |                                                                                                          |
| Island area                             | Geodetic area calculation in Arc GIS 10.2                                                                |
| Elevational range                       | Maximum height of the island based on SRTM <sup>12</sup> calculated in Arc GIS 10.2                      |
| Distance to the mainland                | Weigelt <i>et al.</i> <sup>13</sup>                                                                      |
| Biogeographic region                    | TDWG level 4: <sup>14</sup>                                                                              |

**Table S4: Number of alien and native species per taxon and island. The identifiers in the column “source” correspond to the references listed in table S7.**

| Taxon | Region       | Island                   | Richness |        | Source |
|-------|--------------|--------------------------|----------|--------|--------|
|       |              |                          | Alien    | Native |        |
| Ants  | Brazil       | Fernando de Noronha      | 5        | 2      | 47     |
| Ants  | Caribbean    | Anguilla                 | 9        | 14     | 47     |
| Ants  | Caribbean    | Jamaica                  | 20       | 93     | 47     |
| Ants  | Caribbean    | Bonaire                  | 7        | 4      | 47     |
| Ants  | Caribbean    | Aruba                    | 10       | 7      | 47     |
| Ants  | Caribbean    | Puerto Rico              | 31       | 90     | 47     |
| Ants  | Caribbean    | Antigua and Barbuda      | 18       | 26     | 47     |
| Ants  | Caribbean    | Bahamas                  | 25       | 83     | 47     |
| Ants  | Caribbean    | British Virgin Islands   | 13       | 31     | 47     |
| Ants  | Caribbean    | Cayman Islands           | 6        | 5      | 47     |
| Ants  | Caribbean    | Cuba                     | 28       | 192    | 47     |
| Ants  | Caribbean    | Dominica                 | 13       | 41     | 47     |
| Ants  | Caribbean    | Dominican Republic       | 21       | 104    | 47     |
| Ants  | Caribbean    | Grenada                  | 16       | 71     | 47     |
| Ants  | Caribbean    | Guadeloupe               | 21       | 57     | 47     |
| Ants  | Caribbean    | Haiti                    | 20       | 116    | 47     |
| Ants  | Caribbean    | Martinique               | 16       | 34     | 47     |
| Ants  | Caribbean    | Montserrat               | 14       | 21     | 47     |
| Ants  | Caribbean    | Trinidad and Tobago      | 17       | 290    | 47     |
| Ants  | Caribbean    | Turks and Caicos Islands | 8        | 2      | 47     |
| Ants  | Caribbean    | Virgin Islands. U.S.     | 24       | 44     | 47     |
| Ants  | Caribbean    | Barbados                 | 29       | 48     | 47     |
| Ants  | Caribbean    | Curacao                  | 14       | 13     | 47     |
| Ants  | Eastern Asia | Taiwan                   | 19       | 286    | 47     |
| Ants  | Eastern Asia | Hainan                   | 6        | 113    | 47     |
| Ants  | Eastern Asia | Okinawa                  | 33       | 127    | 47     |
| Ants  | Macaronesia  | Cape Verde               | 6        | 18     | 47     |

|      |                           |                                              |    |     |     |
|------|---------------------------|----------------------------------------------|----|-----|-----|
| Ants | Macaronesia               | Canary Islands (Spain)                       | 23 | 58  | 47  |
| Ants | Malesia                   | Lesser Sundas                                | 9  | 96  | 47  |
| Ants | Malesia                   | Christmas Island                             | 22 | 24  | 47  |
| Ants | Malesia                   | Cocos Islands                                | 10 | 8   | 47  |
| Ants | Malesia                   | Andaman Is.                                  | 7  | 60  | 47  |
| Ants | Malesia                   | Bali                                         | 6  | 55  | 47  |
| Ants | Malesia                   | Maluku                                       | 8  | 207 | 47  |
| Ants | Malesia                   | Nicobar Is.                                  | 6  | 39  | 47  |
| Ants | Malesia                   | Thousand Islands archipelago                 | 6  | 19  | 206 |
| Ants | Mexico                    | Revillagigedo Is.                            | 1  | 4   | 47  |
| Ants | Mexico                    | Clipperton Island                            | 2  | 2   | 47  |
| Ants | Middle Atlantic Ocean     | St Helena                                    | 10 | 0   | 68  |
| Ants | Middle Atlantic Ocean     | Ascension Island                             | 8  | 0   | 47  |
| Ants | New Zealand               | Kermadec Island                              | 5  | 1   | 47  |
| Ants | North-Central Pacific     | Wake Island                                  | 7  | 0   | 122 |
| Ants | North-Central Pacific     | Hawaii (USA)                                 | 60 | 0   | 47  |
| Ants | North-Central Pacific     | Midway Atoll (Northwestern Hawaiian Islands) | 14 | 0   | 47  |
| Ants | North-Central Pacific     | Johnston Island                              | 4  | 0   | 47  |
| Ants | Northeast Tropical Africa | Socotra                                      | 20 | 9   | 47  |
| Ants | Northwestern Pacific      | Guam                                         | 30 | 21  | 47  |
| Ants | Northwestern Pacific      | Marshall Islands                             | 15 | 13  | 47  |
| Ants | Northwestern Pacific      | Micronesia                                   | 29 | 61  | 47  |
| Ants | Northwestern Pacific      | Northern Mariana Islands                     | 25 | 24  | 47  |
| Ants | Northwestern Pacific      | Palau                                        | 27 | 57  | 47  |
| Ants | Northwestern Pacific      | Ogasawara-shoto                              | 29 | 32  | 47  |
| Ants | Papuasias                 | Solomon Islands                              | 25 | 183 | 47  |
| Ants | Papuasias                 | North Solomons                               | 1  | 22  | 47  |
| Ants | South-Central Pacific     | Easter Island (Rapa Nui)                     | 11 | 0   | 47  |
| Ants | South-Central Pacific     | Cook Islands                                 | 19 | 8   | 47  |
| Ants | South-Central Pacific     | Pitcairn Islands                             | 9  | 1   | 47  |
| Ants | South-Central Pacific     | Kiribati Line Is.                            | 15 | 9   | 47  |
| Ants | South-Central Pacific     | U.S. Line Is.                                | 12 | 0   | 47  |

|         |                              |                                |    |     |         |
|---------|------------------------------|--------------------------------|----|-----|---------|
| Ants    | South-Central Pacific        | Marquesas                      | 27 | 7   | 47      |
| Ants    | South-Central Pacific        | Society Is.                    | 39 | 12  | 47      |
| Ants    | South-Central Pacific        | Tuamotu                        | 27 | 7   | 47      |
| Ants    | South-Central Pacific        | Tubuai Is.                     | 28 | 9   | 47      |
| Ants    | South-Central Pacific        | Mangareva                      | 20 | 0   | 206,206 |
| Ants    | Southwestern Pacific         | Niue                           | 16 | 15  | 47      |
| Ants    | Southwestern Pacific         | Samoa                          | 32 | 41  | 47      |
| Ants    | Southwestern Pacific         | Tokelau                        | 15 | 7   | 47      |
| Ants    | Southwestern Pacific         | Tonga                          | 24 | 27  | 47      |
| Ants    | Southwestern Pacific         | Wallis and Futuna              | 16 | 18  | 47      |
| Ants    | Southwestern Pacific         | Tuvalu                         | 1  | 0   | 47      |
| Ants    | Southwestern Pacific         | Fiji                           | 29 | 123 | 47      |
| Ants    | Southwestern Pacific         | Vanuatu                        | 12 | 31  | 47      |
| Ants    | Southwestern Pacific         | Norfolk Island                 | 13 | 17  | 47      |
| Ants    | Southwestern Pacific         | Gilbert Is.                    | 11 | 6   | 47      |
| Ants    | Southwestern Pacific         | Phoenix Is.                    | 5  | 1   | 47      |
| Ants    | West-Central Tropical Africa | Sao Tome                       | 3  | 29  | 47      |
| Ants    | Western Indian Ocean         | Madagascar                     | 44 | 698 | 47      |
| Ants    | Western Indian Ocean         | Mauritius island               | 35 | 32  | 47      |
| Ants    | Western Indian Ocean         | British Indian Ocean Territory | 7  | 2   | 47      |
| Ants    | Western Indian Ocean         | Comoros                        | 28 | 63  | 47      |
| Ants    | Western Indian Ocean         | Seychelles                     | 44 | 45  | 47      |
| Ants    | Western Indian Ocean         | Maldives                       | 1  | 0   | 47      |
| Ants    | Western Indian Ocean         | Sri Lanka                      | 17 | 348 | 47      |
| Ants    | Western Indian Ocean         | Reunion                        | 34 | 17  | 47      |
| Ants    | Western Indian Ocean         | Laccadive Is.                  | 1  | 0   | 47      |
| Ants    | Western Indian Ocean         | Mozambique Channel Is.         | 4  | 14  | 47      |
| Ants    | Western Indian Ocean         | Rodrigues                      | 24 | 7   | 47      |
| Ants    | Western South America        | Galapagos (Ecuador)            | 39 | 33  | 47      |
| Ants    | Western South America        | Costa Rica Isla del Coco       | 12 | 12  | 47      |
| Mammals | Australia                    | Bathurst Island                | 5  | 19  | 29,85   |
| Mammals | Australia                    | Trimouille Island              | 1  | 1   | 29,85   |

|         |           |                   |    |    |       |
|---------|-----------|-------------------|----|----|-------|
| Mammals | Australia | Marchinbar Island | 1  | 6  | 29,85 |
| Mammals | Australia | Moa Island        | 4  | 7  | 29,85 |
| Mammals | Australia | Badu Island       | 3  | 7  | 29,85 |
| Mammals | Australia | Mabuaig Island    | 2  | 1  | 29,85 |
| Mammals | Caribbean | Anguilla          | 2  | 5  | 13,85 |
| Mammals | Caribbean | Jamaica           | 12 | 22 | 13,85 |
| Mammals | Caribbean | Hispaniola        | 14 | 20 | 13,85 |
| Mammals | Caribbean | Tobago            | 3  | 33 | 13,85 |
| Mammals | Caribbean | La Loma           | 1  | 1  | 13,85 |
| Mammals | Caribbean | Grenada           | 12 | 16 | 13,85 |
| Mammals | Caribbean | Bonaire           | 3  | 5  | 13,85 |
| Mammals | Caribbean | Carriacou         | 1  | 1  | 13,85 |
| Mammals | Caribbean | Aruba             | 3  | 4  | 13,85 |
| Mammals | Caribbean | Marie Galante     | 3  | 5  | 13,85 |
| Mammals | Caribbean | La Desirade       | 1  | 0  | 13,85 |
| Mammals | Caribbean | Antigua           | 11 | 8  | 13,85 |
| Mammals | Caribbean | Beata             | 3  | 0  | 13,85 |
| Mammals | Caribbean | Barbuda           | 11 | 7  | 13,85 |
| Mammals | Caribbean | St. Croix         | 12 | 4  | 13,85 |
| Mammals | Caribbean | Vieques           | 4  | 2  | 13,85 |
| Mammals | Caribbean | St. Thomas        | 11 | 3  | 13,85 |
| Mammals | Caribbean | Jost van Dyke     | 1  | 0  | 13,85 |
| Mammals | Caribbean | Tortola           | 2  | 3  | 13,85 |
| Mammals | Caribbean | Puerto Rico       | 15 | 13 | 13,85 |
| Mammals | Caribbean | Anegada           | 10 | 0  | 13,85 |
| Mammals | Caribbean | Grand Cayman      | 5  | 5  | 13,85 |
| Mammals | Caribbean | Little Cayman     | 3  | 0  | 13,85 |
| Mammals | Caribbean | Anclita           | 1  | 1  | 13,85 |
| Mammals | Caribbean | Great Inagua      | 4  | 1  | 13,85 |
| Mammals | Caribbean | Cayo Cantiles     | 1  | 1  | 13,85 |
| Mammals | Caribbean | Middle Caicos     | 2  | 3  | 13,85 |
| Mammals | Caribbean | Providenciales    | 2  | 0  | 13,85 |

|         |             |                                  |    |    |        |
|---------|-------------|----------------------------------|----|----|--------|
| Mammals | Caribbean   | Isla de la Juventud              | 15 | 11 | 13,85  |
| Mammals | Caribbean   | Coco Chico                       | 1  | 0  | 13,85  |
| Mammals | Caribbean   | Mayaguana                        | 2  | 0  | 13,85  |
| Mammals | Caribbean   | Crooked                          | 1  | 2  | 13,85  |
| Mammals | Caribbean   | New Providence                   | 6  | 1  | 13,85  |
| Mammals | Caribbean   | Andros                           | 1  | 2  | 13,85  |
| Mammals | Caribbean   | Grand Bahama                     | 2  | 0  | 13,85  |
| Mammals | Caribbean   | Abaco                            | 3  | 3  | 13,85  |
| Mammals | Caribbean   | British Virgin Islands           | 10 | 3  | 13,85  |
| Mammals | Caribbean   | Cayman Islands                   | 5  | 5  | 13,85  |
| Mammals | Caribbean   | Cuba                             | 26 | 35 | 67,85  |
| Mammals | Caribbean   | Dominica                         | 11 | 12 | 13,85  |
| Mammals | Caribbean   | Guadeloupe                       | 8  | 12 | 13,85  |
| Mammals | Caribbean   | Martinique                       | 7  | 11 | 102,85 |
| Mammals | Caribbean   | Montserrat                       | 3  | 10 | 13,85  |
| Mammals | Caribbean   | Saint Lucia                      | 5  | 8  | 13,85  |
| Mammals | Caribbean   | Saint Vincent and the Grenadines | 6  | 13 | 13,85  |
| Mammals | Caribbean   | Saint-Martin                     | 6  | 4  | 13,85  |
| Mammals | Caribbean   | Turks and Caicos Islands         | 6  | 3  | 231,85 |
| Mammals | Caribbean   | Virgin Islands. U.S.             | 14 | 4  | 13,85  |
| Mammals | Caribbean   | Barbados                         | 9  | 7  | 13,85  |
| Mammals | Caribbean   | Mona                             | 6  | 1  | 13,85  |
| Mammals | Caribbean   | Gonave                           | 4  | 4  | 13,85  |
| Mammals | Caribbean   | St. Eustatius                    | 2  | 4  | 13,85  |
| Mammals | Caribbean   | Saba                             | 2  | 0  | 13,85  |
| Mammals | Caribbean   | Saint Kitts                      | 7  | 7  | 13,85  |
| Mammals | Caribbean   | Nevis                            | 3  | 2  | 13,85  |
| Mammals | Caribbean   | Navassa                          | 2  | 0  | 13,85  |
| Mammals | Macaronesia | El Hierro                        | 4  | 9  | 107,5  |
| Mammals | Macaronesia | Gran Canaria                     | 9  | 10 | 107,5  |
| Mammals | Macaronesia | La Gomera                        | 4  | 9  | 107,5  |
| Mammals | Macaronesia | Tenerife                         | 9  | 8  | 107,85 |

|         |                           |                   |    |    |        |
|---------|---------------------------|-------------------|----|----|--------|
| Mammals | Macaronesia               | Fuerteventura     | 5  | 10 | 107,5  |
| Mammals | Macaronesia               | La Palma          | 6  | 12 | 107,5  |
| Mammals | Macaronesia               | Lanzarote         | 7  | 8  | 107,5  |
| Mammals | Macaronesia               | Sao Tiago         | 4  | 1  | 107,85 |
| Mammals | Macaronesia               | Cape Verde        | 8  | 9  | 74,6   |
| Mammals | Malesia                   | Cocos Islands     | 1  | 0  | 85     |
| Mammals | Malesia                   | Andaman Is.       | 11 | 15 | 211,85 |
| Mammals | Mexico                    | Clipperton Island | 1  | 0  | 102,85 |
| Mammals | Middle Atlantic Ocean     | St Helena         | 9  | 0  | 231,85 |
| Mammals | Middle Atlantic Ocean     | Ascension Island  | 6  | 0  | 231,85 |
| Mammals | North-Central Pacific     | Green (Kure)      | 1  | 2  | 8,85   |
| Mammals | North-Central Pacific     | Kaho'olawe        | 5  | 1  | 8,85   |
| Mammals | North-Central Pacific     | Lana'i            | 9  | 1  | 8,85   |
| Mammals | North-Central Pacific     | Maui              | 10 | 2  | 8,85   |
| Mammals | North-Central Pacific     | Moloka'i          | 11 | 2  | 8,85   |
| Mammals | North-Central Pacific     | O'ahu             | 11 | 2  | 8,85   |
| Mammals | North-Central Pacific     | Ni'ihau           | 3  | 1  | 8,85   |
| Mammals | North-Central Pacific     | Kaua'i            | 10 | 2  | 8,85   |
| Mammals | North-Central Pacific     | Hawaii (USA)      | 16 | 2  | 63,85  |
| Mammals | Northeast Tropical Africa | Socotra           | 10 | 2  | 105,85 |
| Mammals | Northwestern Pacific      | Guam              | 8  | 1  | 22,85  |
| Mammals | Northwestern Pacific      | Marshall Islands  | 7  | 0  | 70,85  |
| Mammals | Northwestern Pacific      | Palau             | 7  | 2  | 70,85  |
| Mammals | Papuasias                 | Darnley Island    | 3  | 0  | 29,85  |
| Mammals | Papuasias                 | Saibai Island     | 4  | 3  | 29,85  |
| Mammals | Papuasias                 | Boigu Island      | 3  | 4  | 29,85  |
| Mammals | South-Central Pacific     | Maæuke            | 7  | 0  | 54,85  |
| Mammals | South-Central Pacific     | French Polynesia  | 11 | 1  | 102,85 |
| Mammals | South-Central Pacific     | Aitutaki          | 2  | 0  | 54,85  |
| Mammals | South-Central Pacific     | Atiu              | 6  | 0  | 54,85  |
| Mammals | South-Central Pacific     | Mangaia           | 4  | 1  | 54,85  |
| Mammals | South-Central Pacific     | Manuae            | 1  | 0  | 54,85  |



|         |                              |                          |     |     |          |
|---------|------------------------------|--------------------------|-----|-----|----------|
| Mammals | South-Central Pacific        | Mitiaro                  | 4   | 0   | 54,85    |
| Mammals | South-Central Pacific        | Rarotonga                | 10  | 1   | 54,85    |
| Mammals | Southwestern Pacific         | Penrhyn                  | 4   | 0   | 54,85    |
| Mammals | Southwestern Pacific         | Niue                     | 6   | 1   | 258,85   |
| Mammals | Southwestern Pacific         | Samoa                    | 5   | 2   | 65,85    |
| Mammals | Southwestern Pacific         | Fiji                     | 5   | 6   | 218,85   |
| Mammals | Southwestern Pacific         | Norfolk Island           | 4   | 2   | 54,85    |
| Mammals | West-Central Tropical Africa | Sao Tome and Principe    | 14  | 7   | 33,85    |
| Mammals | Western Indian Ocean         | Mauritius island         | 10  | 3   | 105,85   |
| Mammals | Western Indian Ocean         | Mayotte                  | 6   | 1   | 102,85   |
| Mammals | Western Indian Ocean         | Sri Lanka                | 5   | 91  | 106,85   |
| Mammals | Western Indian Ocean         | Reunion                  | 8   | 2   | 102,85   |
| Mammals | Western Indian Ocean         | Aldabra                  | 2   | 3   | 3,85     |
| Mammals | Western South America        | Espanola                 | 0   | 0   | 15,85    |
| Mammals | Western South America        | Floreana                 | 10  | 1   | 15,85    |
| Mammals | Western South America        | San Cristobal            | 12  | 1   | 15,85    |
| Mammals | Western South America        | Pinzon                   | 1   | 0   | 15,85    |
| Mammals | Western South America        | Santa Cruz               | 12  | 1   | 15,85    |
| Mammals | Western South America        | Fernandina               | 1   | 3   | 15,85    |
| Mammals | Western South America        | Santiago                 | 3   | 2   | 15,85    |
| Mammals | Western South America        | Isabela                  | 11  | 2   | 15,85    |
| Mammals | Western South America        | Tower                    | 0   | 0   | 15,85    |
| Mammals | Western South America        | Marchena                 | 1   | 1   | 15,85    |
| Mammals | Western South America        | Santa Fe                 | 0   | 1   | 15,85    |
| Mammals | Western South America        | Pinta                    | 0   | 1   | 15,85    |
| Mammals | Western South America        | Galapagos (Ecuador)      | 13  | 6   | 89,85    |
| Mammals | Western South America        | Costa Rica Isla del Coco | 5   | 2   | 73,82,85 |
| Plants  | Australia                    | Ashmore Reef             | 6   | 23  | 94       |
| Plants  | Australia                    | West Wallabi Island      | 24  | 72  | 110      |
| Plants  | Brazil                       | Kiribati                 | 174 | 66  | 28       |
| Plants  | Brazil                       | Trindade and Martin Vaz  | 65  | 51  | 4        |
| Plants  | Caribbean                    | Anguilla                 | 29  | 120 | 1,226    |

|        |                       |                                              |      |      |           |
|--------|-----------------------|----------------------------------------------|------|------|-----------|
| Plants | Caribbean             | Jamaica                                      | 23   | 3304 | 91,11     |
| Plants | Caribbean             | Aruba                                        | 32   | 460  | 229,241   |
| Plants | Caribbean             | Puerto Rico                                  | 795  | 2538 | 12        |
| Plants | Caribbean             | Bahamas                                      | 356  | 1111 | 12        |
| Plants | Caribbean             | Cayman Islands                               | 218  | 539  | 1,96      |
| Plants | Caribbean             | Cuba                                         | 542  | 6498 | 113,96    |
| Plants | Caribbean             | Dominica                                     | 81   | 1226 | 1         |
| Plants | Caribbean             | Grenada                                      | 24   | 1068 | 1         |
| Plants | Caribbean             | Martinique                                   | 144  | 1505 | 1,99      |
| Plants | Caribbean             | Montserrat                                   | 191  | 700  | 203       |
| Plants | Caribbean             | Saint Lucia                                  | 206  | 1100 | 1         |
| Plants | Caribbean             | Barbados                                     | 91   | 572  | 1         |
| Plants | Caribbean             | Virgin Island                                | 284  | 1060 | 12        |
| Plants | Caribbean             | Saint Vincent                                | 81   | 1134 | 1         |
| Plants | Caribbean             | Martinique & Guadeloupe                      | 360  | 1668 | 1         |
| Plants | Caribbean             | Saint Kitts                                  | 37   | 659  | 1,99      |
| Plants | Caribbean             | Navassa                                      | 30   | 147  | 12        |
| Plants | Eastern Asia          | Taiwan                                       | 607  | 3875 | 242,222   |
| Plants | Eastern Asia          | Hainan                                       | 244  | 3046 | 235,99    |
| Plants | Eastern Asia          | Okinawa                                      | 186  | 115  | 104       |
| Plants | Macaronesia           | Cape Verde                                   | 740  | 757  | 2,228,241 |
| Plants | Macaronesia           | Canary Islands (Spain)                       | 548  | 1300 | 2,228,239 |
| Plants | Malesia               | Christmas Island                             | 176  | 209  | 32,99,221 |
| Plants | Malesia               | Cocos (Keeling) Islands                      | 56   | 65   | 219,221   |
| Plants | Mexico                | Socorro                                      | 47   | 116  | 233,99    |
| Plants | Mexico                | Clipperton Island                            | 8    | 14   | 207,99    |
| Plants | Middle Atlantic Ocean | St Helena                                    | 252  | 60   | 100,7     |
| Plants | Middle Atlantic Ocean | Ascension Island                             | 157  | 25   | 45,7      |
| Plants | New Zealand           | Kermadec Island                              | 88   | 116  | 217       |
| Plants | North-Central Pacific | Hawaii (USA)                                 | 1488 | 1586 | 83,12     |
| Plants | North-Central Pacific | Midway Atoll (Northwestern Hawaiian Islands) | 120  | 29   | 83,52     |
| Plants | North-Central Pacific | Johnston Island                              | 24   | 3    | 39,39     |

|        |                       |                                    |     |      |        |
|--------|-----------------------|------------------------------------|-----|------|--------|
| Plants | Northwestern Pacific  | Guam                               | 833 | 420  | 118    |
| Plants | Northwestern Pacific  | Marshall Islands                   | 285 | 86   | 24,24  |
| Plants | Northwestern Pacific  | Micronesia                         | 383 | 1194 | 28,241 |
| Plants | Northwestern Pacific  | Rota                               | 239 | 284  | 118    |
| Plants | Northwestern Pacific  | Sarigan                            | 40  | 94   | 118,99 |
| Plants | Northwestern Pacific  | Saipan                             | 231 | 251  | 118    |
| Plants | Northwestern Pacific  | Tinian                             | 214 | 182  | 118    |
| Plants | Northwestern Pacific  | Northern Mariana Islands           | 298 | 420  | 24,24  |
| Plants | Northwestern Pacific  | Ailinginae Atoll                   | 8   | 21   | 202    |
| Plants | Northwestern Pacific  | Eniwetok                           | 50  | 41   | 213    |
| Plants | Northwestern Pacific  | Majuro Atoll                       | 17  | 56   | 230,99 |
| Plants | Northwestern Pacific  | Rongelap Atoll                     | 35  | 27   | 202    |
| Plants | Northwestern Pacific  | Alamagan                           | 71  | 123  | 118    |
| Plants | Northwestern Pacific  | Agrihan                            | 69  | 113  | 118    |
| Plants | Northwestern Pacific  | Asuncion Island                    | 16  | 62   | 118    |
| Plants | Northwestern Pacific  | Aguijan                            | 33  | 55   | 118    |
| Plants | Northwestern Pacific  | Anatahan                           | 54  | 100  | 118    |
| Plants | Northwestern Pacific  | Pagan                              | 101 | 136  | 118    |
| Plants | Papuasias             | Solomon Islands                    | 200 | 3200 | 240,96 |
| Plants | South-Central Pacific | Easter Island (Rapa Nui)           | 68  | 43   | 208    |
| Plants | South-Central Pacific | Cook Islands                       | 401 | 284  | 28     |
| Plants | South-Central Pacific | French Polynesias                  | 560 | 959  | 38,241 |
| Plants | South-Central Pacific | Northern Line Islands (Kiribati)   | 41  | 35   | 237    |
| Plants | South-Central Pacific | Kiritimati                         | 49  | 41   | 237,99 |
| Plants | South-Central Pacific | Tabueran                           | 94  | 26   | 237    |
| Plants | South-Central Pacific | Teraina                            | 63  | 26   | 237    |
| Plants | South-Central Pacific | Raivavae                           | 267 | 166  | 38     |
| Plants | South-Central Pacific | Rimatara                           | 192 | 80   | 38     |
| Plants | South-Central Pacific | Tubuai                             | 304 | 165  | 38,99  |
| Plants | South-Central Pacific | Pitcairn Islands: Henderson Island | 7   | 63   | 38     |
| Plants | South-Central Pacific | Eiao                               | 62  | 46   | 10,99  |
| Plants | South-Central Pacific | Fatu Hiva                          | 303 | 175  | 10,99  |

|        |                              |                               |       |      |         |
|--------|------------------------------|-------------------------------|-------|------|---------|
| Plants | South-Central Pacific        | Hatutaa                       | 29    | 28   | 10,99   |
| Plants | South-Central Pacific        | Hiva Oa                       | 430   | 205  | 10,99   |
| Plants | South-Central Pacific        | Mohotani                      | 49    | 35   | 10,99   |
| Plants | South-Central Pacific        | Nuku Hiva (Marquesas Islands) | 569   | 254  | 10,99   |
| Plants | South-Central Pacific        | Tahuata                       | 148   | 85   | 10      |
| Plants | South-Central Pacific        | Ua Huka                       | 314   | 97   | 10,99   |
| Plants | South-Central Pacific        | Ua Pou                        | 270   | 90   | 10,99   |
| Plants | Southwestern Pacific         | Penrhyn                       | 107   | 33   | 227,38  |
| Plants | Southwestern Pacific         | American Samoa                | 236   | 471  | 251,241 |
| Plants | Southwestern Pacific         | Niue                          | 307   | 175  | 240,216 |
| Plants | Southwestern Pacific         | Samoa                         | 321   | 550  | 238     |
| Plants | Southwestern Pacific         | Tonga                         | 301   | 451  | 28,243  |
| Plants | Southwestern Pacific         | Nauru                         | 368   | 60   | 220     |
| Plants | Southwestern Pacific         | Fiji                          | 521   | 1769 | 40,50   |
| Plants | Southwestern Pacific         | Norfolk Island                | 271   | 171  | 46      |
| Plants | Southwestern Pacific         | Ofu                           | 86    | 218  | 251     |
| Plants | Southwestern Pacific         | Olosega                       | 33    | 223  | 251     |
| Plants | Southwestern Pacific         | Tau                           | 131   | 338  | 251     |
| Plants | Southwestern Pacific         | Tutuila                       | 177   | 399  | 251     |
| Plants | Southwestern Pacific         | Canton                        | 47    | 24   | 214,214 |
| Plants | Southwestern Pacific         | Enderbury                     | 6     | 19   | 214,99  |
| Plants | Southwestern Pacific         | Hull                          | 21    | 23   | 214,214 |
| Plants | Southwestern Pacific         | Sydney                        | 11    | 18   | 214,214 |
| Plants | Southwestern Pacific         | Lakeba                        | 109   | 183  | 40      |
| Plants | Southwestern Pacific         | Nayau                         | 96    | 177  | 40      |
| Plants | Southwestern Pacific         | Rotuma                        | 236   | 277  | 108     |
| Plants | West-Central Tropical Africa | Sao Tome                      | 30    | 700  | 37,2    |
| Plants | West-Central Tropical Africa | Principe                      | 19    | 300  | 37,2    |
| Plants | Western Asia                 | Hormoz and Qeshm              | 49    | 230  | 234     |
| Plants | Western Indian Ocean         | Madagascar                    | 12000 | 517  | 120,121 |
| Plants | Western Indian Ocean         | Mauritius island              | 731   | 887  | 101,215 |
| Plants | Western Indian Ocean         | Seychelles                    | 165   | 222  | 247,204 |

|          |                       |                                   |     |      |             |
|----------|-----------------------|-----------------------------------|-----|------|-------------|
| Plants   | Western Indian Ocean  | Sri Lanka                         | 365 | 3368 | 209,99      |
| Plants   | Western Indian Ocean  | Reunion                           | 628 | 915  | 240,55      |
| Plants   | Western Indian Ocean  | Laccadive Is.                     | 28  | 348  | 84          |
| Plants   | Western Indian Ocean  | Rodrigues                         | 305 | 154  | 2,215,228   |
| Plants   | Western Indian Ocean  | Diego Garcia                      | 130 | 36   | 250         |
| Plants   | Western South America | Galapagos (Ecuador)               | 263 | 552  | 48,86       |
| Reptiles | Arabian Peninsula     | Bahrain                           | 2   | 15   | 225,9       |
| Reptiles | Brazil                | Kiribati                          | 2   | 13   | 57,245      |
| Reptiles | Caribbean             | Anguilla                          | 3   | 12   | 17,36       |
| Reptiles | Caribbean             | Jamaica                           | 1   | 40   | 17          |
| Reptiles | Caribbean             | Grenada                           | 5   | 14   | 17,41,51,69 |
| Reptiles | Caribbean             | Antigua                           | 2   | 10   | 17,26       |
| Reptiles | Caribbean             | Barbuda                           | 0   | 8    | 17,26       |
| Reptiles | Caribbean             | Puerto Rico                       | 4   | 52   | 17,90       |
| Reptiles | Caribbean             | Bonaire. Saint Eustatius and Saba | 1   | 7    | 17,23       |
| Reptiles | Caribbean             | British Virgin Islands            | 1   | 23   | 17,36       |
| Reptiles | Caribbean             | Cayman Islands                    | 7   | 22   | 17,35       |
| Reptiles | Caribbean             | Cuba                              | 5   | 150  | 17,         |
| Reptiles | Caribbean             | Dominica                          | 4   | 13   | 17,255      |
| Reptiles | Caribbean             | Dominican Republic                | 5   | 111  | 17,         |
| Reptiles | Caribbean             | Guadeloupe                        | 4   | 19   | 17          |
| Reptiles | Caribbean             | Haiti                             | 2   | 120  | 17          |
| Reptiles | Caribbean             | Martinique                        | 3   | 12   | 102,14      |
| Reptiles | Caribbean             | Montserrat                        | 1   | 9    | 17,36       |
| Reptiles | Caribbean             | Saint Lucia                       | 4   | 16   | 17          |
| Reptiles | Caribbean             | Saint Vincent and the Grenadines  | 6   | 12   | 17          |
| Reptiles | Caribbean             | Saint-Bartholemy                  | 5   | 11   | 17,117      |
| Reptiles | Caribbean             | Saint-Martin                      | 3   | 13   | 17,248      |
| Reptiles | Caribbean             | Sint Maarten                      | 3   | 13   | 17,248      |
| Reptiles | Caribbean             | Trinidad and Tobago               | 4   | 67   | 61,111      |
| Reptiles | Caribbean             | Turks and Caicos Islands          | 1   | 12   | 17,36       |
| Reptiles | Caribbean             | Virgin Islands. U.S.              | 2   | 24   | 17,         |

|          |                           |                          |    |    |            |
|----------|---------------------------|--------------------------|----|----|------------|
| Reptiles | Caribbean                 | Barbados                 | 3  | 9  | 17,223     |
| Reptiles | Caribbean                 | Saint Kitts              | 1  | 8  | 17         |
| Reptiles | Caribbean                 | Curacao                  | 1  | 8  | 23,117     |
| Reptiles | Caribbean                 | Nevis                    | 0  | 8  | 17         |
| Reptiles | Eastern Asia              | Taiwan                   | 7  | 95 | 210,31     |
| Reptiles | Macaronesia               | Cape Verde               | 3  | 24 | 232,6      |
| Reptiles | Macaronesia               | Canary Islands (Spain)   | 7  | 33 | 116,5      |
| Reptiles | Malesia                   | Christmas Island         | 6  | 6  | 66         |
| Reptiles | Malesia                   | East Timor               | 4  | 26 | 92         |
| Reptiles | Malesia                   | Cocos Islands            | 3  | 2  | 19,19      |
| Reptiles | Mexico                    | Clipperton Island        | 1  | 3  | 21,93,245  |
| Reptiles | Middle Atlantic Ocean     | St Helena                | 3  | 3  | 36         |
| Reptiles | Middle Atlantic Ocean     | Ascension Island         | 4  | 4  | 36         |
| Reptiles | North-Central Pacific     | Hawaii (USA)             | 25 | 0  | 112,245,77 |
| Reptiles | Northeast Tropical Africa | Socotra                  | 1  | 30 | 98,119     |
| Reptiles | Northwestern Pacific      | Guam                     | 6  | 16 | 95,95      |
| Reptiles | Northwestern Pacific      | Marshall Islands         | 4  | 18 | 53,245     |
| Reptiles | Northwestern Pacific      | Micronesia               | 5  | 27 | 95,245     |
| Reptiles | Northwestern Pacific      | Palau                    | 4  | 36 | 25,245     |
| Reptiles | Papuasias                 | Solomon Islands          | 4  | 81 | 109        |
| Reptiles | South-Central Pacific     | Easter Island (Rapa Nui) | 4  | 2  | 56,245     |
| Reptiles | South-Central Pacific     | Cook Islands             | 14 | 6  | 54,245     |
| Reptiles | South-Central Pacific     | Pitcairn Islands         | 1  | 3  | 44,36      |
| Reptiles | Southwestern Pacific      | Penrhyn                  | 6  | 0  | 54         |
| Reptiles | Southwestern Pacific      | American Samoa           | 2  | 12 | 65,49      |
| Reptiles | Southwestern Pacific      | Niue                     | 1  | 10 | 16,245     |
| Reptiles | Southwestern Pacific      | Samoa                    | 1  | 22 | 36,245     |
| Reptiles | Southwestern Pacific      | Tokelau                  | 0  | 6  | 75         |
| Reptiles | Southwestern Pacific      | Tonga                    | 4  | 24 | 246,245    |
| Reptiles | Southwestern Pacific      | Wallis and Futuna        | 1  | 12 | 102,43     |
| Reptiles | Southwestern Pacific      | Tuvalu                   | 0  | 14 | 103,245    |
| Reptiles | Southwestern Pacific      | Nauru                    | 1  | 9  | 224,245    |

|          |                              |                                |    |     |         |
|----------|------------------------------|--------------------------------|----|-----|---------|
| Reptiles | Southwestern Pacific         | Fiji                           | 3  | 32  | 245     |
| Reptiles | Southwestern Pacific         | Vanuatu                        | 3  | 37  | 64,245  |
| Reptiles | Southwestern Pacific         | Norfolk Island                 | 1  | 2   | 59,20   |
| Reptiles | West-Central Tropical Africa | Sao Tome and Principe          | 1  | 23  | 87,76   |
| Reptiles | Western Indian Ocean         | Mauritius island               | 15 | 13  | 71,60   |
| Reptiles | Western Indian Ocean         | British Indian Ocean Territory | 3  | 3   | 36      |
| Reptiles | Western Indian Ocean         | Comoros                        | 7  | 16  | 205,34  |
| Reptiles | Western Indian Ocean         | Mayotte                        | 1  | 18  | 102,62  |
| Reptiles | Western Indian Ocean         | Seychelles                     | 5  | 29  | 58,42   |
| Reptiles | Western Indian Ocean         | Maldives                       | 2  | 5   | 30      |
| Reptiles | Western Indian Ocean         | Reunion                        | 13 | 5   | 212,80  |
| Reptiles | Western South America        | Galapagos (Ecuador)            | 4  | 49  | 72,88   |
| Birds    | Arabian Peninsula            | Bahrain                        | 13 | 94  | 261,262 |
| Birds    | Brazil                       | Kiribati                       | 5  | 52  | 261,262 |
| Birds    | Caribbean                    | Anguilla                       | 4  | 82  | 261,262 |
| Birds    | Caribbean                    | Antigua                        | 4  | 80  | 261,262 |
| Birds    | Caribbean                    | Aruba                          | 3  | 68  | 261,262 |
| Birds    | Caribbean                    | Bahamas                        | 17 | 195 | 261,262 |
| Birds    | Caribbean                    | Barbados                       | 7  | 99  | 261,262 |
| Birds    | Caribbean                    | Barbuda                        | 2  | 78  | 261,262 |
| Birds    | Caribbean                    | Bonaire                        | 1  | 71  | 261,262 |
| Birds    | Caribbean                    | Cayman Islands                 | 7  | 128 | 261,262 |
| Birds    | Caribbean                    | Cuba                           | 17 | 222 | 261,262 |
| Birds    | Caribbean                    | Dominica                       | 4  | 105 | 261,262 |
| Birds    | Caribbean                    | Dominican Republic             | 16 | 187 | 261,262 |
| Birds    | Caribbean                    | Haiti                          | 10 | 186 | 261,262 |
| Birds    | Caribbean                    | Jamaica                        | 14 | 168 | 261,262 |
| Birds    | Caribbean                    | Montserrat                     | 3  | 76  | 261,262 |
| Birds    | Caribbean                    | Puerto Rico                    | 49 | 155 | 261,262 |
| Birds    | Caribbean                    | Saba                           | 1  | 42  | 261,262 |
| Birds    | Caribbean                    | Saint Kitts and Nevis          | 2  | 72  | 261,262 |
| Birds    | Caribbean                    | Saint Lucia                    | 3  | 92  | 261,262 |

|       |                           |                                              |     |     |         |
|-------|---------------------------|----------------------------------------------|-----|-----|---------|
| Birds | Caribbean                 | Saint Vincent                                | 1   | 87  | 261,262 |
| Birds | Caribbean                 | Sint Maarten                                 | 2   | 73  | 261,262 |
| Birds | Caribbean                 | The Grenadines                               | 6   | 70  | 261,262 |
| Birds | Caribbean                 | Tortola                                      | 2   | 110 | 261,262 |
| Birds | Caribbean                 | Trinidad and Tobago                          | 17  | 338 | 261,262 |
| Birds | Caribbean                 | Turks and Caicos Islands                     | 4   | 126 | 261,262 |
| Birds | Eastern Asia              | Hainan                                       | 1   | 281 | 261,262 |
| Birds | Eastern Asia              | Okinawa                                      | 5   | 108 | 261,262 |
| Birds | Eastern Asia              | Taiwan                                       | 1   | 278 | 261,262 |
| Birds | Macaronesia               | Canary Islands (Spain)                       | 16  | 110 | 261,262 |
| Birds | Macaronesia               | Cape Verde                                   | 7   | 53  | 261,262 |
| Birds | Malesia                   | Cocos (Keeling) Islands                      | 4   | 15  | 261,262 |
| Birds | Malesia                   | Maluku                                       | 14  | 339 | 261,262 |
| Birds | Middle Atlantic Ocean     | Ascension Island                             | 6   | 17  | 261,262 |
| Birds | Middle Atlantic Ocean     | St Helena                                    | 14  | 16  | 261,262 |
| Birds | New Zealand               | Kermadec Island                              | 6   | 49  | 261,262 |
| Birds | North-Central Pacific     | Hawaii (USA)                                 | 104 | 79  | 261,262 |
| Birds | North-Central Pacific     | Midway Atoll (Northwestern Hawaiian Islands) | 3   | 33  | 261,262 |
| Birds | Northeast Tropical Africa | Socotra                                      | 1   | 76  | 261,262 |
| Birds | Northwestern Pacific      | Aguijan                                      | 2   | 42  | 261,262 |
| Birds | Northwestern Pacific      | Guam                                         | 9   | 36  | 261,262 |
| Birds | Northwestern Pacific      | Marshall Islands                             | 4   | 40  | 261,262 |
| Birds | Northwestern Pacific      | Micronesia                                   | 6   | 74  | 261,262 |
| Birds | Northwestern Pacific      | Northern Mariana Islands                     | 4   | 57  | 261,262 |
| Birds | Northwestern Pacific      | Palau                                        | 8   | 61  | 261,262 |
| Birds | Northwestern Pacific      | Rota                                         | 6   | 34  | 261,262 |
| Birds | Northwestern Pacific      | Saipan                                       | 4   | 46  | 261,262 |
| Birds | Northwestern Pacific      | Tinian                                       | 3   | 41  | 261,262 |
| Birds | Papuasias                 | Solomon Islands                              | 2   | 238 | 261,262 |
| Birds | South-Central Pacific     | Bora Bora                                    | 4   | 35  | 261,262 |
| Birds | South-Central Pacific     | Cook Islands                                 | 4   | 40  | 261,262 |
| Birds | South-Central Pacific     | Easter Island (Rapa Nui)                     | 5   | 20  | 261,262 |



|       |                              |                  |    |    |         |
|-------|------------------------------|------------------|----|----|---------|
| Birds | South-Central Pacific        | French Polynesia | 10 | 79 | 261,262 |
| Birds | South-Central Pacific        | Huahine          | 3  | 34 | 261,262 |
| Birds | South-Central Pacific        | Mohotani         | 1  | 40 | 261,262 |
| Birds | South-Central Pacific        | Moorea           | 7  | 37 | 261,262 |
| Birds | South-Central Pacific        | Raiatea          | 6  | 34 | 261,262 |
| Birds | South-Central Pacific        | Raivavae         | 1  | 26 | 261,262 |
| Birds | South-Central Pacific        | Rurutu           | 1  | 28 | 261,262 |
| Birds | South-Central Pacific        | Tahaa            | 1  | 34 | 261,262 |
| Birds | South-Central Pacific        | Tahiti           | 16 | 41 | 261,262 |
| Birds | South-Central Pacific        | Tahuata          | 1  | 42 | 261,262 |
| Birds | South-Central Pacific        | Tetiaroa         | 1  | 34 | 261,262 |
| Birds | South-Central Pacific        | Tubuai           | 2  | 27 | 261,262 |
| Birds | South-Central Pacific        | Ua Huka          | 3  | 42 | 261,262 |
| Birds | Southwestern Pacific         | American Samoa   | 1  | 47 | 261,262 |
| Birds | Southwestern Pacific         | Fiji             | 13 | 98 | 261,262 |
| Birds | Southwestern Pacific         | Nauru            | 1  | 27 | 261,262 |
| Birds | Southwestern Pacific         | Norfolk Island   | 11 | 46 | 261,262 |
| Birds | Southwestern Pacific         | Samoa            | 6  | 59 | 261,262 |
| Birds | Southwestern Pacific         | Tonga            | 7  | 53 | 261,262 |
| Birds | Southwestern Pacific         | Tutuila          | 3  | 43 | 261,262 |
| Birds | West-Central Tropical Africa | Principe         | 2  | 54 | 261,262 |
| Birds | West-Central Tropical Africa | Sao Tome         | 9  | 62 | 261,262 |
| Birds | Western Indian Ocean         | Aldabra          | 1  | 40 | 261,262 |
| Birds | Western Indian Ocean         | Assumption       | 2  | 26 | 261,262 |
| Birds | Western Indian Ocean         | Comoros          | 11 | 69 | 261,262 |
| Birds | Western Indian Ocean         | Cosmoledo        | 1  | 29 | 261,262 |
| Birds | Western Indian Ocean         | Diego Garcia     | 4  | 20 | 261,262 |
| Birds | Western Indian Ocean         | La Digue         | 5  | 42 | 261,262 |
| Birds | Western Indian Ocean         | Maldives         | 4  | 61 | 261,262 |
| Birds | Western Indian Ocean         | Mauritius island | 31 | 33 | 261,262 |
| Birds | Western Indian Ocean         | Reunion          | 27 | 33 | 261,262 |
| Birds | Western Indian Ocean         | Seychelles       | 17 | 69 | 261,262 |

|       |                       |                     |   |     |         |
|-------|-----------------------|---------------------|---|-----|---------|
| Birds | Western Indian Ocean  | Silhouette          | 1 | 38  | 261,262 |
| Birds | Western Indian Ocean  | Sri Lanka           | 4 | 340 | 261,262 |
| Birds | Western South America | Galapagos (Ecuador) | 4 | 105 | 261,262 |

**Table S5. Sources for species richness values.**

| <b>Reference No.</b> | <b>Reference</b>                                                                                                                                                                                                                                                                                                                                                                                                                                                               |
|----------------------|--------------------------------------------------------------------------------------------------------------------------------------------------------------------------------------------------------------------------------------------------------------------------------------------------------------------------------------------------------------------------------------------------------------------------------------------------------------------------------|
| 1                    | Acevedo-Rodríguez, P. & M.T. Strong. 2007. Catalogue of the seed plants of the West Indies Website. <a href="https://repository.si.edu/handle/10088/17551">https://repository.si.edu/handle/10088/17551</a> ; [10/2016]                                                                                                                                                                                                                                                        |
| 2                    | African Plants Database (version 3.4.0). Conservatoire et Jardin botaniques de la Ville de Genève and South African National Biodiversity Institute, Pretoria (2014), available at <a href="http://www.ville-ge.ch/musinfo/bd/cjb/africa/">http://www.ville-ge.ch/musinfo/bd/cjb/africa/</a>                                                                                                                                                                                   |
| 3                    | Aldabra Atoll Initial Assessment report. Available at: <a href="http://whc.unesco.org/document/6947">whc.unesco.org/document/6947</a>                                                                                                                                                                                                                                                                                                                                          |
| 4                    | Alves, R. J. V. (1998) Ilha da Trindade e Arquipélago Martin Vaz: um ensaio geobotânico. Serviço de Documentação da Marinha, Rio de Janeiro, Brasil.                                                                                                                                                                                                                                                                                                                           |
| 5                    | Arechevaleta M., Rodríguez S., Zurita N., García A. (2010) Lista de especies silvestres de Canarias. Hongos, plantas y animales terrestres. 2009. Gobierno de Canarias. 579 pp.                                                                                                                                                                                                                                                                                                |
| 6                    | Arechavaleta M., Zurita N., Marrero M. C. & Martin J. L. (2005) Lista preliminar de especies silvestres de Cabo Verde (hongos, plantas y animales terrestres). Consejería de Medio Ambiente y Ordenación Territorial, Gobierno de Canarias, 155pp                                                                                                                                                                                                                              |
| 7                    | Ashmole, P. & Ashmole, M. (2000) St Helena and Ascension Island: A Natural History. Anthony Nelson Ltd.                                                                                                                                                                                                                                                                                                                                                                        |
| 8                    | Atkinson, I. A. E & Atkinson, T. J. (2000) Land vertebrates as invasive species on islands served by the South Pacific Regional Environment Programme. In: (eds) Sherley, G. (2000) Invasive Species in the Pacific: A Technical Review and Draft Regional Strategy, 19-84.                                                                                                                                                                                                    |
| 9                    | Bahrain First National Report To the Convention on Biological Diversity. Available at: <a href="http://bh.chm-cbd.net/implementation/national-reports-cbd/bahrain-first-national-report/bahrain-first-national-report/download/ar/1/First%20National%20Report%202006.pdf?action=view">http://bh.chm-cbd.net/implementation/national-reports-cbd/bahrain-first-national-report/bahrain-first-national-report/download/ar/1/First%20National%20Report%202006.pdf?action=view</a> |
| 10                   | Barker, W.R., Barker, R.M., Jessop, J.P. & Vonow, H.P. (2005). Census of South Australian vascular plants. Journal of the Adelaide Botanic Gardens Supplement, 1, 1–396.                                                                                                                                                                                                                                                                                                       |
| 11                   | Barthlott, W., Mutke, J., Rafiqpoor, D., Kier, G. & Kreft H. (2005) Global Centers of Vascular Plant Diversity. Nova Acta Leopoldina 92, 61-83.                                                                                                                                                                                                                                                                                                                                |
| 12                   | Kartesz, J.T., The Biota of North America Program (BONAP). 2015. Taxonomic Data Center. ( <a href="http://www.bonap.net/tdc">http://www.bonap.net/tdc</a> ). Chapel Hill, N.C.                                                                                                                                                                                                                                                                                                 |
| 13                   | Borroto-Páez, R. & Woods, C. A. (2009) Status and impact of introduced mammals of the West Indies. In: Terrestrial Mammals of the West Indies: Contributions, Florida Museum of Natural History and Wacahoota Press.                                                                                                                                                                                                                                                           |
| 14                   | Breuil, M. (2002) Histoire naturelle des Amphibiens et Reptiles terrestres de l'archipel Guadeloupéen : Guadeloupe, Saint-Martin, Saint-Barthélemy. Muséum national d'Histoire naturelle, Paris.                                                                                                                                                                                                                                                                               |

- 15 Jiménez-Uzcátegui, G., Snell, H. L. (2013). CDF Checklist of Galapagos Mammals - FCD Lista de especies de Mamíferos Galápagos. In: Bungartz, F., Herrera, H., Jaramillo, P., Tirado, N., Jiménez-Uzcátegui, G., Ruiz, D., Guézou, A. & Ziemmeck, F. (eds.). Charles Darwin Foundation Galapagos Species Checklist - Lista de Especies de Galápagos de la Fundación Charles Darwin. Charles Darwin Foundation / Fundación Charles Darwin, Puerto Ayora, Galapagos: <http://checklists.datazone.darwinfoundation.org/vertebrates/mammalia/>
- 16 Butler, D. J., Powlesland, R. G. & Westbrooke, I. M. (2012) Status of birds, peka (flying foxes) and reptiles on Niue Island. SPREP, Apia, Samoa.
- 17 Caribherp (2016). Available at: <http://www.caribherp.org>
- 18 Christy, P. (2001) São Tomé and Príncipe. Important bird areas in Africa and associated islands : priority sites for conservation (eds L.D.C. Fishpool & M.I. Evans), BirdLife International, Newbury, 727-732.
- 19 Cogger, H. (2014) Reptiles and amphibians of Australia. CSIRO PUBLISHING.
- 20 Cogger, H., Muir, G. & O'Shea, G. (2006). A survey of the terrestrial reptiles of Norfolk Island March 2005. Department of Environment and Heritage, Australian Government.
- 21 Ota, H. & Ineich, I. (2006) Colonization of the Gold Dust Day Gecko, *Phelsuma laticauda* (Reptilia: Gekkonidae), in Moorea of the Society Archipelago, French Polynesia. *Current Herpetology* 25, 97-99.
- 22 Conry, P. J. (1988) Managment of feral and exotic game species on Guam. *Transactions of the Western Section of the Wildlife Society*, 24, 26-30.
- 23 van Buurt, G. (2011). Conservation of amphibians and reptiles in Aruba, Curacao and Bonaire. *Conservation of Caribbean Island Herpetofaunas, Vol 1: Conservation Biology and the Wider Caribbean*. Brill. Pp. 145-159
- 24 Costion, C. M. & Lorence D. H. (2012) The endemic plants of Micronesia: A geographical checklist and commentary. *Micronesia*, 43, 51-100.
- 25 Crombie, R. I. & Pregill, G. K. (1999) A checklist of the herpetofauna of the Palau Islands (Republic of Belau), Oceania. *Herpetological Monographs*, 13, 29-80.
- 26 Daltry, J. C. (2007) An introduction to the herpetofauna of Antigua, Barbuda and Redonda, with some conservation recommendations. *Applied Herpetology*, 4, 97-130.
- 27 Daudin, J. & de Silva, M. (2011) An annotated checklist of the amphibians and terrestrial reptiles of the Grenadines with notes on their local natural history and conservation. *Applied Herpetology*, 4, 163-175.
- 28 Denslow, J. S., Space, J. C. & Thomas, P. A. (2009) Invasive Exotic Plants in the Tropical Pacific Islands: Patterns of Diversity. *Biotropica*, 41, 162-170.
- 29 Department of the Environment, Water, Heritage and the Arts of the Australian Government (2010) Feral animals on offshore islands database. Available at: <http://www.environment.gov.au/biodiversity/invasive/ferals/islands>

- 30 Deraniyagala, P. E. P. (1956) Zoological collecting at the Maldives in 1932. *Spolia Zeylanica*, 28, 4–15.
- 31 DMNC - Digital Museum of Nature & Culture. Available at: <http://digimuse.nmns.edu.tw>
- 32 Du Puy, D. J. (1993) Christmas Island: species lists. *Flora of Australia*, 50: Oceanic Islands, Canberra, AGPS Press.
- 33 Dutton, J. (1994) Introduced mammals in Sao Tomé and Príncipe: possible threats to biodiversity. *Biodiversity and Conservation*, 3, 927-938.
- 34 ECDD, BCSF & Durrell (2014) Terrestrial Biodiversity Mapping of the Comoro Islands: Methods and Results. [www.ecddcomoros.org](http://www.ecddcomoros.org). Lead author: Katie Green
- 35 Echternacht, A., Burton, F. J. & Blumenthal, J. M. (2010) The amphibians and reptiles of the Cayman Islands: Conservation issues in the face of invasions. *Conservation issues in the Cayman Islands*
- 36 Edgar, P. (2010) The amphibians and reptiles of the UK Overseas Territories, Crown Dependencies and Sovereign Base Areas: Species inventory and overview of conservation and research priorities. *Amphibian and Reptile Conservation*, Boscombe, United Kingdom.
- 37 Figueiredo, E., Paiva, J., Stevart, T., Oliveira, F. & Smith, G. F. (2011) Annotated catalogue of the flowering plants of São Tomé and Príncipe. *Bothalia*, 41, 41-82.
- 38 Florence, J., Chevillotte, H., Ollier, C. & Meyer, J.-Y. (2007). Base de donnees botaniques Nadeaud de l'Herbier de la Polnesie francaise (PAP). Available at: <http://www.herbier-tahiti.pf>. Last accessed 1 July 2011.
- 39 Fosberg, F.R. (1949) Flora of Johnston Island, Central Pacific. *Pacific Science*, 3, 338-339.
- 40 Franklin, J., Keppel, G. & Whistler, W. A. (2008) The vegetation and flora of Lakeba, Nayau and Aiwa islands, central Lau Group, Fiji. *Micronesica*, 40, 169-225.
- 41 Greene, B. T., Yorks, D. T., Parmer-Lee, J. S. Jr., Powell, R., and Henderson, R. W. (2002). Discovery of *Anolis sagrei* in Grenada with comments on its potential impact on native anoles. *Caribbean Journal of Sciences*, 38, 270 – 272.
- 42 Gerlach, J. (2008) Population and conservation status of the reptiles of the Seychelles islands. *Phelsuma*, 16, 30-48
- 43 Gill, B. I. (1995) Notes of the land reptiles of Wallis and Futuna, South West Pacific. *Records of the Auckland Institute and Museum*, 32, 55-61.
- 44 Gill, B. I. (1993) The lizards of the Pitcairn Island group, South Pacific. *New Zealand Journal of Zoology*, 20, 161-164.
- 45 Gray, A., Pelembe, T. & Stroud, S. (2005) The conservation of the endemic vascular flora of Ascension Island and threats from alien species. *Oryx*, 39, 1-5.
- 46 Green, P. S. (1994) Norfolk Island: Species lists. *Flora of Australia Online: Norfolk and Lord Howe Islands*, available at <http://www.environment.gov.au/biodiversity/abrs/online-resources/flora/49/index.html>
- 47 Guénard, B., Weiser, M., Gomez, K., Narula, N., Economo, E.P. (In Press) The Global Ant Biodiversity Informatics (GABI) database: a synthesis of ant species geographic distributions. *Myrmecological News*.

- 48 Guézou, A., Chamorro, S., Pozo, P., Guerrero, A. M., Atkinson, R., Buddenhagen, C., Jaramillo Díaz, P., Gardener, M. (2014).  
CDF Checklist of Galapagos Introduced Plants - FCD Lista de especies de Plantas introducidas Galápagos. In: Bungartz, F.,  
Herrera, H., Jaramillo, P., Tirado, N., Jiménez-Uzcátegui, G., Ruiz, D., Guézou, A. & Ziemmeck, F. (eds.). Charles Darwin  
Foundation Galapagos Species Checklist - Lista de Especies de Galápagos de la Fundación Charles Darwin. Charles Darwin  
Foundation / Fundación Charles Darwin, Puerto Ayora, Galapagos:  
<http://www.darwinfoundation.org/datazone/checklists/introduced-species/introduced-plants/>
- 49 Goldin, M. R. (2002) Field Guide to the Samoan Archipelago - Fish, Wildlife, and Protected Areas. Bess Press, Honolulu,  
Hawaii.
- 50 Heads, M. (2000) Seed plants of Fiji: an ecological analysis. *Biological Journal of the Linnean Society*, 89, 407-431.
- 51 Henderson, R. W. & Berg, C. S. (2006) The herpetofauna of Grenada and the Grenada Grenadines: Conservation concerns.  
*Applied Herpetology*, 3, 197-213.
- 52 Herbst, D.R. & Wagner, W.L. 1992. Alien plants on the Northwestern Hawaiian Islands, p. 189–224. In: Alien plant invasions  
in native ecosystems of Hawaii: management and research . University of Hawaii, Honolulu.
- 53 The OEPPC, Government of the Republic of Marshall Islands (2004) Reptiles and Amphibians of the Marshall Islands.  
Available at: [http://biormi.org/index\\_nav\\_left.shtml?en/reptiles.shtml](http://biormi.org/index_nav_left.shtml?en/reptiles.shtml)
- 54 Cook Islands Natural Heritage Trust (2007) Biodiversity Database. Available at: <http://cookislands.bishopmuseum.org/>
- 55 Conservatoire botanique national centre permanent d'initiatives pour l'environnement Mascarin. Available at:  
[http://flore.cbnm.org/index.php?option=com\\_content&view=article&id=3&Itemid=3](http://flore.cbnm.org/index.php?option=com_content&view=article&id=3&Itemid=3)
- 56 Imagina Easter Island (2017) Easter Island Wildlife. Available at: <http://imaginaisladepascua.com/en/easter-islands/easter-island-animals/>
- 57 Government of India - India Biodiversity Portal (IBP). Available at: <http://indiabiodiversity.org/species>
- 58 Amphibians and Reptiles of Seychelles. Available at: <http://islandbiodiversity.com/herps.htm>
- 59 Australian Government Department of Environment and Heritage (2005) A survey of the terrestrial reptiles (*Christinus*  
*guentheri* and *Oligosoma lichenigera*) of Norfolk Island. Available at: <http://laptop.deh.gov.au/parks/norfolk/nature/fauna.html>
- 60 Mauritius National Parks and Conservation Service - Reptiles of Mauritius. Available at:  
<http://npcs.govmu.org/English/Pages/Reptiles.aspx>
- 61 Murphy, J. C. The Herpetofauna of Trinidad and Tobago: Amphibians, Reptiles and the Environment. Available at:  
<http://trinidad-tobagoherps.org/>
- 62 UICN (2014) La liste rouge des espèces menacées en France. Available at: [http://uicn-france.fr/wp-content/uploads/2014/05/Tableau\\_Liste\\_rouge\\_Reptiles\\_et\\_Amphibiens\\_de\\_Mayotte.pdf](http://uicn-france.fr/wp-content/uploads/2014/05/Tableau_Liste_rouge_Reptiles_et_Amphibiens_de_Mayotte.pdf)
- 63 Kinsey, T. B. Wildlife of Hawaii. Available at: <http://wildlifeofhawaii.com/hawaii-mammals.html>

- 64 AmphibiaWeb (2017) <<http://amphibiaweb.org>> University of California, Berkeley, CA, USA. Accessed 1 Feb 2017
- 65 Craig, P. (2009) Natural history guide to American Samoa. 3rd edition, National Park of American Samoa.
- 66 Australian Government - Parks Australia: Christmas Island National Park (2016) Available at:  
<http://www.christmasislanddirectory.com.au/National-Parks-Reptiles.aspx>
- 67 Borroto-Páez, R. (2009) Invasive mammals in Cuba: an overview. *Biological Invasions*, 11, 2279-2290.
- 68 Wetterer, J. K., Espadaler, X., Ashmole, N. P., Mendel, H., Cutler, C. & Endeman, J. (2007) Ants (Hymenoptera: Formicidae) of the South Atlantic islands of Ascension Island, St Helena, and Tristan da Cunha. *Myrmecological News*. 10, 29-37.
- 69 Lever, C. (2003) *Naturalized Reptiles and Amphibians of the World*. Oxford University Press, New York.
- 70 Shine, C., J.K. Reaser, and A.T. Gutierrez. (eds.). 2003. *Invasive alien species in the Austral Pacific Region: National Reports & Directory of Resources*. Global Invasive Species Programme, Cape Town, South Africa.
- 71 Capinha, C., Seebens, H., Cassey, P., García-Díaz, P., Lenzner, B., Mang, T., Moser, D., Pyšek, P., Rödder, D., Scalera, R., Winter, M., Dullinger, S. & Essl, F. (2017) Diversity, biogeography and the global flows of alien amphibians and reptiles. *Diversity and Distributions*, doi: 10.1111/ddi.12617.
- 72 Phillips, R.B., Wiedenfeld, D.A. & Snell, H.L. (2012) Current status of alien vertebrates in the Galápagos Islands: invasion history, distribution, and potential impacts. *Biological Invasions*, 14, 461-480.
- 73 Sierra, C. (2000) El cerdo cimarrón (*Sus scrofa*, Suidae) en la Isla del Coco, Costa Rica: escarbaduras, alteraciones al suelo y erosión. *Revista de Biología Tropical*. 49, 3-4.
- 74 Hazevoet, C. J. & Masseti, M. (2011) On the history of the green monkey *Chlorocebus sabaeus* (L., 1766) in Cape Verde Islands, with notes on other introduced mammals. *Soologia Caboverdiana*, 2, 12-24.
- 75 Pierce, R., Gruber, M., Atherton, J., Burne, A., Valu, M. & Whistler, A. (2012) A conservation survey of Tokelau. Eco Oceania Pty Ltd Plan for Tokelau Administration and Critical Ecosystem Partnership Fund.
- 76 WWF - Islands of Sao Tomé and Príncipe of the coast of Equatorial Guinea. Available at:  
<http://www.worldwildlife.org/ecoregions/at0127>
- 77 Amber Wright (2016), personal communication
- 78 St. Kitts and Nevis National Biodiversity Strategy and Action Plan. Convention on Biological Diversity. Available at:  
<https://www.cbd.int/doc/world/kn/kn-nbsap-01-p5-en.pdf>
- 79 Kerr, A.M. (2003) *Illustrated guide to the reptiles and amphibians of the Mariana Islands, Micronesia*. University of Guam, Guam, USA.
- 80 Bour, R. & Moutou, F. (1982) Reptiles et amphibiens de l'île de la Réunion. *Info-Nature Ile Réunion* 19: 119-156.

- 81 Government of St. Kitts and Nevis (2004) National Biodiversity Strategy and Action Plan for St. Kitts and Nevis
- 82 Maarten Kappelle (2016) Costa Rican Ecosystems. The University of Chicago Press, Chicago, London.
- 83 Imada, C. T. (2012) Hawaiian native and naturalized vascular plants checklist. Bishop Museum Technical Report 60, Honolulu, Hawai'i.
- 84 Inderjit (2014) unpublished, compiled from various sources
- 85 IUCN (2016) The IUCN Red List of Threatened Species. Version 2016-1. <http://www.iucnredlist.org> (Downloaded on 14.05.2016)
- 86 Jaramillo Díaz, P., Guézou, A., Mauchamp, A., Tye, A. (2015). CDF Checklist of Galapagos Flowering Plants - FCD Lista de especies de Plantas con flores Galápagos. In: Bungartz, F., Herrera, H., Jaramillo, P., Tirado, N., Jiménez-Uzcátegui, G., Ruiz, D., Guézou, A. & Ziemmeck, F. (eds.). Charles Darwin Foundation Galapagos Species Checklist - Lista de Especies de Galápagos de la Fundación Charles Darwin. Charles Darwin Foundation / Fundación Charles Darwin, Puerto Ayora, Galapagos: <http://www.darwinfoundation.org/datazone/checklists/vascular-plants/magnoliophyta/> Last updated: 08 Sep 2015
- 87 Abreu de Jesus, J. M. (2005) Filogeografía e sistemática molecular de répteis de alguns arquipélagos africanos do Atlântico oriental. Universidade de Madeira.
- 88 Jiménez-Uzcátegui, G., Márquez, C., Snell, H. L. (2014). CDF Checklist of Galapagos Reptiles - FCD Lista de especies de Reptiles Galápagos. In: Bungartz, F., Herrera, H., Jaramillo, P., Tirado, N., Jiménez-Uzcátegui, G., Ruiz, D., Guézou, A. & Ziemmeck, F. (eds.). Charles Darwin Foundation Galapagos Species Checklist - Lista de Especies de Galápagos de la Fundación Charles Darwin. Charles Darwin Foundation / Fundación Charles Darwin, Puerto Ayora, Galapagos: <http://www.darwinfoundation.org/datazone/checklists/vertebrates/reptilia/>
- 89 Jiménez-Uzcátegui, G., Ruiz, D., Snell, H. L. (2011). CDF Checklist of Galapagos Terrestrial & Marine Vertebrates - FCD Lista de especies de Vertebrados terrestres y marinos de Galápagos. In: Bungartz, F., Herrera, H., Jaramillo, P., Tirado, N., Jiménez-Uzcátegui, G., Ruiz, D., Guézou, A. & Ziemmeck, F. (eds.). Charles Darwin Foundation Galapagos Species Checklist - Lista de Especies de Galápagos de la Fundación Charles Darwin. Charles Darwin Foundation / Fundación Charles Darwin, Puerto Ayora, Galapagos: <http://darwinfoundation.org/datazone/checklists/vertebrates/>
- 90 Joglar, R., Álvarez, A.O., Aide, T.M., Barber, D., Burrowes, P.A., García, M.A., León-Cardona, A., Longo, A.V., Pérez-Buitrago, N. & Puente, A. (2011) Conserving the Puerto Rican herpetofauna. Conservation of Caribbean Island Herpetofaunas, 2, 339-358.
- 91 Kairo, M., Ali, B., Cheesman, O., Haysom, K. & Murphy, S. (2003) Invasive Species Threats in the Caribbean Region. Report to the Nature Conservancy. Cab international.
- 92 Kaiser, H., Lopes Carvalho, V., Ceballos, J., Freed, P., Heacox, S., Lester, B., Richards, S. J., Trainor, C. R., Sanchez, C., & O'Shea, M. (2011) The herpetofauna of Timor-Leste: a first report. ZooKeys, 109, 19-86.



- 93 Tonione, M. A., Reeder, N. & Moritz, C. C. (2011) High Genetic Diversity Despite the Potential for Stepping-Stone  
Colonizations in an Invasive Species of Gecko on Moorea, French Polynesia. *PLOSOne*, 6, e26874.
- 94 Kenneally K. F. (1993). Ashmore Reef and Cartier Island. *Flora of Australia: Volume 50: Oceanic Islands 2*. Canberra: AGPS  
Press.
- 95 Kerr, A. M. (2003) *Illustrated guide to the reptiles and amphibians of the Mariana Islands, Micronesia*. University of Guam,  
Guam, USA.
- 96 Kissling, W. D., Baker, W. J., Balslev, H., Barfod, A. S., Borchsenius, F., Dransfield, J., Govaerts, R. & Svenning, J.-C.  
(2012) Quaternary and pre-Quaternary historical legacies in the global distribution of a major tropical plant lineage. *Global  
Ecology and Biogeography*, 21, 909-921.
- 97 Knapp, C.R., Iverson, J.B., Buckner, S.D. & Cant, S.V. (2011) *Conservation of amphibians and reptiles in The Bahamas*. Brill.
- 98 Kornilios, P., Giokas, S., Lymberakis, P. & Sindaco, R. (2013) Phylogenetic position, origin and biogeography of Palearctic  
and Socotran blind-snakes (Serpentes: Typhlopidae). *Molecular Phylogenetics and Evolution*, 68, 35–41.
- 99 Kreft, H., Jetz, W., Kier, J. & Barthlott, W. (2008) Global Diversity of island floras from a macroecological perspective.  
*Ecology Letters*, 11, 116-127.
- 100 Lambdo, P. & Darlow, A. (2012) *Flowering Plants and Ferns of St. Helena*. Pisces Publications.
- 101 Lavergne, C., Rameau, J. C. & Figier, J. (1999) The invasive woody weed *Ligustrum robustum* subsp. *Walkeri* threatens  
native forests on La Réunion. *Biological Invasions*, 1, 1-377.
- 102 Les vertébrés terrestres introduits en outre-mer et leurs impacts. Guide illustré des principales espèces envahissantes. Comité  
français de l'UICN, ONCFS. France. 100 pages.
- 103 Lovich, J. (2005) Introduced reptiles and amphibians of the world: unwanted exotic species. *Diversity and Distributions*, 11,  
591.
- 104 List of Naturalised plants in Japan (2010). Available at: [www.rib.okayama-u.ac.jp/wild/kika\\_table.htm](http://www.rib.okayama-u.ac.jp/wild/kika_table.htm).
- 105 Long, J. L. (2003) *Introduced mammals of the world: their history, distribution and influence*. Csiro Publishing.
- 106 Marambe, B., Silva, P., Ranwala, S., Gunawardena, J., Weerakoon, D., Wijesundara, S., Manawadu, L., Atapattu, A. &  
Kurukulasuriya, M. (2011) Invasive alien fauna in Sri Lanka: National list, impacts and regulatory framework. In: Veitch, C.  
R.; Clout, M. N. and Towns, D. R. (eds.). 2011. *Island invasives: eradication and management*. IUCN, Gland, Switzerland.
- 107 Masseti, M. (2010) Mammals of the Macaronesian islands (the Azores, Madeira, the Canary and Cape Verde Islands):  
Redefinition of the ecological equilibrium. *Mammalia* 74, 3-34.
- 108 McClatchey W., Thaman R. & Vodonaivalu S. (2000) A preliminary checklist of the flora of Rotuma with Rotuman names.  
*Pacific Science* 54, 345-363.

- 109 McCoy, M. (2006). Reptiles of the Solomon Islands. Pensoft Publishers.
- 110 McCrea J. (2003) Inventory of the land conservation values of the Houtman Abrolhos Islands. Department of Fisheries, Government of Western Australia, Perth, Australia.
- 111 Murphy, J. C. (1997) Amphibians and reptiles of Trinidad and Tobago. Krieger Publishing Company
- 112 Nature Serve (2014) NatureServe Explorer database. Available at: <http://explorer.natureserve.org/aboutd.htm>
- Oviedo Prieto, R., Herrera Olivier, P., Caluff, M. G., Regalado, L., Ventosa Rodríguez I., Plasencia Fraga, J. M., Baró Oviedo, I., González Gutiérrez, P. A., Pérez Camacho, J., Hechavarría Schwesinger, L., González-Oliva, L., Catasús Guerra, L., Padrón Soroa, J., Suárez Terán, S.I., Echevarría Cruz, R., Fuentes Marrero, I. M., Rosa Angulo, R., Oriol Rodríguez, P., Bonet Mayedo, W., Villate Gómez, M., Sánchez Abad, N., Begué Quiala, G., Villaverde López, R., Chateloin Torres, T., Matos Mederos, J., Gómez Fernández, R., Acevedo Josmaily Lóriga Piñeiro, C., Romero Jiménez, M., Mesa Muñoz, I., Vale González, A., Leiva, A. T., Hernández Valdés, J. A., Gómez Campo, N. E., Toscano Silva, B. L., González Echevarría, M. T., Menéndez García, A., Chávez Zorrilla, M. I. & Torres Cruz, M. (2011) Lista nacional de especies de plantas invasoras y potencialmente invasoras en la República de Cuba. *Bissea*, 6, 22-92.
- 113
- 114 Perry, G. & Gerber, G. (2011) Conservation of amphibians and reptiles in the British Virgin Islands: Status and patterns. *Conservation of Caribbean Island Herpetofaunas*, 2, 105-127.
- 115 Platenberg, R. J. & Boulon Jr, R. H. (2011) Conservation status of reptiles and amphibians in the US Virgin Islands. *Conservation of Caribbean Island Herpetofaunas*, 2, 407-428.
- Pleguezuelos, J. M., Márquez, R. & Lizana, M. (2002). Atlas y Libro Rojo de los anfibios y reptiles de España. Madrid: Dirección General de Conservación de la naturaleza, Asociación Herpetológica Española, Organismo Autónomo Parques Nacionales.
- 116
- 117 Powell, R., Henderson, R.W., Farmer, M.C., Breuil, M., Echternacht, A.C., van Buurt, G., Romagosa, C.M. & Perry, G. (2011) Introduced amphibians and reptiles in the Greater Caribbean: Patterns and conservation implications. *Conservation of Caribbean Island Herpetofauna Volume 1: Conservation Biology and the Wider Caribbean*, Brill, pp 63-144.
- 118 Raulerson, L. (2006) Checklist of plants of the Mariana Islands. *University of Guam Herbarium Contribution* 37, 1-69.
- 119 Razzetti, E., Sindaco, R., Grieco, C., Pella, F., Ziliani, U., Pupin, F., Riservato, E., Pellitteri-Rosa, D., Butikofer, L., Suleiman, A. S., Al-Aseily, B. A., Carugati, C., Boncompagni, E. & Fasola, M. (2011) Annotated checklist and distribution of the Socotran Archipelago Herpetofauna (Reptilia). *Zootaxa*, 2826, 1-44.
- 120 Kull, C. A., Tassin, J., Moreau, S., Ramiarantsoa, H. R., Blanc-Pamard, C. & Carrière, S. M. (2011) The introduced flora of Madagascar. *Biological Invasions* 14:875-888.
- 121 Roux, J. P. (2009) Synopsis of Lycopodiophyta of Africa, Madagascar and neighbouring islands. *Strelitzia*, Pretoria.

- 122 Timberlake, P. H. (1926) Hymenoptera. In: Bryan Jr., E. H. and collaborators (1926) Insects of Hawaii, Johnston Island and Wake Island. Bernice P. Bishop Museum, Bulletin 31, Honolulu, Hawaii.
- 200 Reed, R. N., Rodda, G. H., Siers, S. R., Wostl, E. & Adams, A. A. Y. (2010) Terrestrial reptiles of Pagan Island, Commonwealth of the Northern Mariana Islands. USGS, Colorado, USA.
- 202 Releford, J. S., Stevens, J., Bridges, K. & McClatchey, W. C. (2009) Flora of Rongelap and Ailinginae Atolls, Republic of the Marshall Islands. Atoll Research Bulletin, 572.
- 203 Robbins, S. K., Hamilton, M. A., Clubbe, C. & Barrios, S. (2008) The Montserrat non-native plant species checklist. In: Young P (ed) A biodiversity assessment of the Centre Hills, Montserrat. Durrell Conservation Monographs 1:312-319.
- 204 Robertson, S.A. (1989) Flowering Plants of Seychelles (An annotated Check List, of Angiosperms and Gymnosperms, with Line Drawing). Royal Botanical Gardens.
- 205 Rocha, S., Posada, D., Carretero, M. A. & Harris, D. J. (2007) Phylogenetic affinities of Comoroan and East African day geckos (genus *Phelsuma*): Multiple natural colonisations, introductions and island radiations. *Molecular Phylogenetics and Evolution*, 43, 685-692.
- 206 Roura-Pascual, N., Sanders, N. J. & Hui, C. (2016) The distribution and diversity of insular ants: do exotic species play by different rules? *Global Ecology and Biogeography*, 25, 642-654.
- 207 Sachet, M-H. (1962) Flora and vegetation of Clipperton Island. *Proceedings of the California Academy of Sciences*, 31, 249-307.
- 208 Sax, D. F., Gaines, S. D. & Brown, J. H. (2002) Species Invasions exceed extinctions on islands worldwide: a comparative study of plants and birds. *American Naturalist*, 160, 766-783.
- 209 Senaratna, L. K. (2001) A Check List of the Flowering Plants of Sri Lanka. National Science Foundation Sri Lanka.
- 210 Shiau, T.-W., Hou, P.-C., Wu, S.-H. & Tu, M.-C. (2006) A survey on alien pet reptiles in Taiwan. *Taiwania*, 51, 71-80.
- 211 Sivakumar, K. (2004) Introduced mammals in Andaman and Nicobar Islands (India): A conservation perspective. *Aliens*, 17, 11.
- 212 Soubeyran, Y., Caceres, S. & Chevassus, N. Les vertébrés terrestres introduits en outre-mer et leurs impacts. Guide illustré des principales especes envahissantes. UICN French Committee.
- 213 St John, H. (1960) Flora of Eniwetok Atoll. *Pacific Science*, 14, 313-336.
- 214 Stoddart, D. R. & Fosberg, F. R. (1994) Flora of the Phoenix Islands, central Pacific. *Atoll Research Bulletin* 393, 1-60.
- 215 Strahm, W. A. (1993) The conservation and restoration of the flora of Mauritius and Rodrigues. PhD Thesis.
- 216 Sykes, W. R. (1970) Contributions to the flora of Niue. *Bulletin Department of Scientific and Industrial Research, New Zealand*, 200, 321pp.

- 217 Sykes, W. R. (2000) Kermadec Islands Flora - Special Edition: A Compilation of modern material about the Flora of the  
Kermadec Islands. Manaaki Whenua Press, Lincoln, Canterbury, New Zealand.
- 218 Fiji Biodiversity Strategy and Action Plan. Convention on Biological Diversity. Available at:  
<https://www.cbd.int/doc/world/fj/fj-nbsap-01-en.pdf>
- 219 Telford, I. R. H. (1993) Cocos (Keeling) Islands: Species lists. Flora of Australia , 50: Oceanic Islands 2. Canberra: AGPS  
Press.
- 220 Thaman R. R., Fosberg, F. R., Manner, H.I. & Hassall, D.C. (1994) The flora of Nauru. Atoll Research Bulletin, 392, 1-233.
- 221 Flora of Australia Online (2013) Oceanic islands excluding Norfolk and Lord Howe Islands. Available at:  
<http://www.anbg.gov.au/abrs/online-resources/flora/stddisplay.xsql?pnid=54674>.
- 222 Huang TC (ed.): Flora of Taiwan 2ed. Vol. 4. Taipei: Editorial Committee of the Flora of Taiwan, Department of Botany,  
National Taiwan University.
- 223 The Natural Heritage Department (2011) Barbados' fourth national report to the convention on biological diversity.
- 224 Buden, D. W. (2008) The Reptiles of Nauru. Pacific Science 62, 499-507.
- 225 Tourenq, C. & Shuriqi, M. K. (2010) Snapshot on introduced invasives in a desertic country, the United Arab Emirates.  
Aliens: The Invasive Species Bulletin, 30, 49-51.
- 226 UKOTs Online Herbarium (2011) Available at: <http://dps.plants.ox.ac.uk/bol/UKOT>
- 227 University of Kent (2012). Cook Islands Biodiversity and Ethnobiology Database. Available at:  
<http://cookislands.pacificbiodiversity.net/cibed/dbs/search.html>.
- 228 Jan Wieringa (2013), personal communication
- 229 van der Burg, W. J., de Freitas, J., Debrot, A. O. & Lotz, L. A. P. (2012) Naturalised and invasive alien plant species in the  
Caribbean Netherlands: status, distribution, threats, priorities and recommendations. Plant Research International,  
Wageningen, the Netherlands.
- 230 Vander Velde N (2003) The vascular plants of Majuro atoll, Republic of the Marshall Islands. Atoll Research Bulletin 503.
- 231 Varnham, K. (2006) Non-native species in UK Overseas Territories: a review. Report - Joint Nature Conservation Committee  
372.
- 232 Vasconcelos, R., Brito, J. C., Carranza, S. & Harris, D. J. (2013) Review of the distribution and conservation status of the  
terrestrial reptiles of the Cape Verde Islands. Oryx, 47, 77-87.
- 233 Villaseñor, J.- L. & F.-J. Espinosa-Garcia (2004) The alien flowering plants of Mexico. Diversity and Distributions, 10, 113-  
123.
- 234 Vitousek, P.M., D'Antonio, C. M., Loope, L. L., Rejmanek, M. & Westbrooks, R. (1997) Introduced species: a significant  
component of human-caused global change. New Zealand Journal of Ecology, 21, 1-16.

- 235 Wensheng Shu (2013) unpublished, compiled from various sources.
- 237 Wester L. (1985) Checklist of the vascular plants of the northern Line Islands. *Atoll Research Bulletin* 187:1-38.
- 238 Whistler W. A. (1983) Vegetation and flora of the Aleipata Islands, Western Samoa. *Pacific Science* 37:227-249.
- 239 Whittaker, R. J. & Fernández-Palacios, J. M. (2007) *Island biogeography: ecology, evolution, and conservation*, 2nd edn. Oxford University Press, Oxford, UK.
- 240 WCSP (2016). 'World Checklist of Selected Plant Families. Facilitated by the Royal Botanic Gardens, Kew. Published on the Internet; <http://apps.kew.org/wcsp/>
- 241 World Resources Institute (WIR) - Data Sets. Available at: [http://www.wri.org/resources/data\\_sets](http://www.wri.org/resources/data_sets)
- 242 Wu, S.-H., Yang, T. Y. A., Teng, Y.-C., Chang, C.-Y., Yang, K.-C. & Hsieh, C.-F. (2010) Insights of the latest naturalized flora of Taiwan: Change in the past eight years. *Taiwania* 55, 139-159.
- 243 Yuncker, T. G. (1959) *Plants of Tonga*. Bishop Museum Bulletin, 220, Bishop Museum Honolulu, Hawaii, USA.
- 245 Zug, G. R. (2013) *Reptiles and amphibians of the Pacific Islands: a comprehensive guide*. University of California Press.
- 246 Zug, G. R., Ineich, I., Gregill, G. & Hamilton, A. M. (2012) Lizards of Tonga with Description of a New Tongan Treeskink (Squamata: Scincidae: *Emoia samoensis* Group). *Pacific Science* 66, 225-237.
- 247 Gerlach, J. (2003) The biodiversity of the granitic islands of Seychelles. *Phelsuma* 11 (Supplement A):1-47.
- 248 Powell, R. (2011) Conservation of the herpetofauna on the Dutch Windward Islands: St. Eustatius, Saba, and St. Maarten. In: (eds) Hailey, A., Wilson, B. S. & Horrocks, J. A. (2011) *Conservation of Caribbean Island Herpetofaunas, Vol 2: Regional Accounts of the West Indies*, Brill.
- 250 Whistler, W. A. (1996) Botanical survey of Diego Garcia, Chagos Archipelago, British Indian Ocean Territory. *Isle Botanica*, Appendix E1:1-72.
- 251 Whistler, W. A. (1998) *A study of the rare plants of American Samoa*. US Fish and Wildlife Service, Honolulu, Hawaii.
- 252 Vasconcelos, R., Froufe, E., Brito, J., Carranza, S. & Harris, D. (2010) Phylogeography of the African common toad, *Amietophrynus regularis*, based on mitochondrial DNA sequences: inferences regarding the Cape Verde population and biogeographical patterns. *African Zoology*, 45, 291-298.
- 253 Rodríguez Schettino, L., Mancina, C. & González, V.R. (2013) Reptiles of Cuba: Checklist and geographic distributions. *Smithsonian Herpetological Information Service*, 144, 1-96.
- 254 Hedges, S.B. & Díaz, L.M. (2011) The conservation status of amphibians in the West Indies. *Conservation of Caribbean Island Herpetofaunas*, 1, 31-47.
- 255 Malhotra, A., Thorpe, R.S., Hypolite, E., James, A., Hailey, A., Wilson, B. & Horrocks, J. (2011) A report on the status of the herpetofauna of the Commonwealth of Dominica, West Indies. *Conservation of Caribbean Island Herpetofaunas*, 2, 149-166.

- 256 Powell, R. & Incháustegui, S.J. (2009) Conservation of the herpetofauna of the Dominican Republic. *Applied Herpetology*, 6, 103-122
- 257 García-Díaz, P., Ross, J.V., Ayres, C. & Cassey, P. (2015) Understanding the biological invasion risk posed by the global wildlife trade: propagule pressure drives the introduction and establishment of Nearctic turtles. *Global Change Biology*, 21, 1078-1091.
- 258 CBD (2001) Niue: first country report to the Convention on Biological Diversity
- 259 Russell, J. C., Cole, N. C., Zuñel, N. & Rocamora, G. (2016) Introduced mammals on Western Indian Ocean islands. *Global Ecology and Conservation*, 6, 132-144.
- 260 Boos, H. E. A. (2001). *The snakes of Trinidad and Tobago*. A&M University Press, Texas.
- 261 Dyer, E.E., Redding, D.W. & Blackburn, T.M. (2017) The global avian invasions atlas, a database of alien bird distributions worldwide. *Scientific Data*, 4, 170041.
- 262 BirdLife International and Handbook of the Birds of the World (2016) Bird species distribution maps of the world. Version 6.0. Available at <http://datazone.birdlife.org/species/requestdis>.

**Table S6. Generalized linear models (GLMs) of regressing species richness (alien, native) against six predictor variables including an autocovariate term to account for spatial autocorrelation.**

|                                    | Alien                       |                |                  | Native                      |                |                  |
|------------------------------------|-----------------------------|----------------|------------------|-----------------------------|----------------|------------------|
|                                    | <i>Coefficient</i><br>(±SE) | <i>z-value</i> | <i>p-value</i>   | <i>Coefficient</i><br>(±SE) | <i>z-value</i> | <i>p-value</i>   |
| <b>Vascular plants</b>             |                             |                |                  |                             |                |                  |
| <i>Intercept</i>                   | 5.02(±0.08)                 | 66.71          | <0.001           | 5.32(±0.07)                 | 74.62          | <0.001           |
| <b><i>Distance to mainland</i></b> | <b>0.39(±0.07)</b>          | <b>5.72</b>    | <b>&lt;0.001</b> | <b>-0.20(±0.05)</b>         | <b>-4.12</b>   | <b>&lt;0.001</b> |
| <i>Island area</i>                 | 0.65(±0.08)                 | 7.82           | <0.001           | 1.01(±0.05)                 | 20.03          | <0.001           |
| <i>Elevational range</i>           | 0.12(±0.10)                 | 1.18           | 0.239            | 0.33(±0.09)                 | 3.84           | <0.001           |
| <i>Mean annual temp.</i>           | -0.08(±0.06)                | -1.36          | 0.175            | -0.01(±0.05)                | -0.24          | 0.810            |
| <i>Annual prec. sum</i>            | -0.07(±0.06)                | -1.19          | 0.237            | 0.24(±0.04)                 | 5.37           | <0.001           |
| <i>Per-capita GDP</i>              | 0.38(±0.07)                 | 5.60           | <0.001           | -0.05(±0.05)                | -0.96          | 0.339            |
| <i>Auto-covariate</i>              | 0.00(±0.00)                 | 0.70           | 0.488            | 0.00(±0.00)                 | 6.55           | <0.001           |
| <b>Ants</b>                        |                             |                |                  |                             |                |                  |
| <i>Intercept</i>                   | 2.67(±0.06)                 | 43.38          | <0.001           | 3.03(±0.12)                 | 25.77          | <0.001           |
| <b><i>Distance to mainland</i></b> | <b>0.29(±0.07)</b>          | <b>4.35</b>    | <b>&lt;0.001</b> | <b>-0.54(±0.10)</b>         | <b>-5.27</b>   | <b>&lt;0.001</b> |
| <i>Island area</i>                 | 0.30(±0.09)                 | 3.45           | 0.001            | 1.14(±0.12)                 | 9.77           | <0.001           |
| <i>Elevational range</i>           | 0.17(±0.10)                 | 1.70           | 0.094            | -0.10(±0.14)                | -0.70          | 0.488            |
| <i>Mean annual temp.</i>           | 0.01(±0.07)                 | 0.09           | 0.929            | 0.06(±0.10)                 | 0.59           | 0.555            |
| <i>Annual prec. sum</i>            | 0.10(±0.07)                 | 1.50           | 0.137            | 0.43(±0.09)                 | 4.87           | <0.001           |
| <i>Per-capita GDP</i>              | 0.18(±0.06)                 | 2.90           | 0.005            | 0.10(±0.10)                 | 0.96           | 0.342            |
| <i>Auto-covariate</i>              | 0.03(±0.01)                 | 3.25           | 0.002            | 0.01(±0.01)                 | 1.65           | 0.103            |
| <b>Mammals</b>                     |                             |                |                  |                             |                |                  |
| <i>Intercept</i>                   | 1.60(±0.06)                 | 27.21          | <0.001           | 0.89(±0.09)                 | 10.33          | <0.001           |
| <b><i>Distance to mainland</i></b> | <b>0.10(±0.06)</b>          | <b>1.86</b>    | <b>0.066</b>     | <b>-0.61(±0.06)</b>         | <b>-10.93</b>  | <b>&lt;0.001</b> |
| <i>Island area</i>                 | 0.33(±0.07)                 | 4.49           | <0.001           | 0.54(±0.08)                 | 7.12           | <0.001           |
| <i>Elevational range</i>           | 0.29(±0.09)                 | 3.28           | 0.001            | 0.43(±0.11)                 | 3.83           | <0.001           |
| <i>Mean annual temp.</i>           | 0.14(±0.07)                 | 2.11           | 0.037            | 0.04(±0.07)                 | 0.57           | 0.573            |
| <i>Annual prec. sum</i>            | 0.02(±0.06)                 | 0.39           | 0.699            | 0.16(±0.07)                 | 2.45           | 0.016            |
| <i>Per-capita GDP</i>              | 0.22(±0.06)                 | 3.86           | <0.001           | 0.08(±0.08)                 | 1.03           | 0.306            |
| <i>Auto-covariate</i>              | -0.01(±0.01)                | -0.92          | 0.359            | 0.04(±0.01)                 | 4.21           | <0.001           |
| <b>Reptiles</b>                    |                             |                |                  |                             |                |                  |
| <i>Intercept</i>                   | 1.28(±0.11)                 | 12.14          | <0.001           | 2.73(±0.07)                 | 37.02          | <0.001           |
| <b><i>Distance to mainland</i></b> | <b>0.24(±0.10)</b>          | <b>2.30</b>    | <b>0.025</b>     | <b>-0.21(±0.07)</b>         | <b>-2.82</b>   | <b>0.006</b>     |
| <i>Island area</i>                 | 0.30(±0.13)                 | 2.27           | 0.027            | 0.94(±0.08)                 | 11.56          | <0.001           |
| <i>Elevational range</i>           | 0.11(±0.15)                 | 0.72           | 0.472            | 0.03(±0.10)                 | 0.25           | 0.800            |
| <i>Mean annual temp.</i>           | -0.11(±0.11)                | -0.99          | 0.326            | 0.30(±0.08)                 | 3.53           | 0.001            |
| <i>Annual prec. sum</i>            | 0.07(±0.11)                 | 0.69           | 0.492            | 0.11(±0.07)                 | 1.60           | 0.114            |
| <i>Per-capita GDP</i>              | 0.24(±0.09)                 | 2.59           | 0.012            | 0.04(±0.07)                 | 0.54           | 0.594            |
| <i>Auto-covariate</i>              | 0.04(±0.02)                 | 2.04           | 0.045            | -0.05(±0.02)                | -2.61          | 0.011            |

**Table S7: Linear model of regressing the value of imported products against the area and distance to mainland.**

|                                    | <i>Coefficient (±SE)</i> | <i>t-value</i> | <i>p-value</i> |
|------------------------------------|--------------------------|----------------|----------------|
| <i>Intercept</i>                   | 6.50(±0.24)              | 26.95          | <0.001         |
| <b><i>Distance to mainland</i></b> | <b>-0.83(±0.25)</b>      | <b>-3.27</b>   | <b>0.003</b>   |
| <i>Island area</i>                 | 0.91(±0.22)              | 4.29           | <0.001         |
| <i>Auto-covariate</i>              | 0.04(±0.12)              | 0.34           | 0.739          |

**Table S8: Wordbank import statistics for 31 islands and archipelagos.**

| <b>Island</b>                  | <b>Imports of all products<br/>in 2006 in Mil. US\$</b> | <b>Distance<br/>km</b> | <b>Area<br/>km<sup>2</sup></b> |
|--------------------------------|---------------------------------------------------------|------------------------|--------------------------------|
| Aruba                          | 1041                                                    | 27                     | 182                            |
| Antigua and Barbuda            | 671                                                     | 685                    | 436                            |
| The Bahamas                    | 2984                                                    | 86                     | 13388                          |
| Bahrain                        | 8957                                                    | 1                      | 665                            |
| Barbados                       | 1629                                                    | 359                    | 435                            |
| Comoros                        | 101                                                     | 297                    | 1673                           |
| Cape Verde                     | 538                                                     | 570                    | 4091                           |
| Cuba                           | 10174                                                   | 199                    | 110731                         |
| Dominica                       | 167                                                     | 499                    | 754                            |
| Dominican Republic             | 8422                                                    | 554                    | 48106                          |
| Fiji                           | 1804                                                    | 2628                   | 18600                          |
| Micronesia, Federated States   | 138                                                     | 1874                   | 775                            |
| Grenada                        | 299                                                     | 139                    | 360                            |
| Jamaica                        | 5041                                                    | 615                    | 11000                          |
| Kiribati                       | 62                                                      | 3084                   | 1012                           |
| St. Kitts and Nevis            | 250                                                     | 702                    | 267                            |
| St. Lucia                      | 592                                                     | 345                    | 614                            |
| Sri Lanka                      | 9773                                                    | 23                     | 65837                          |
| Madagascar                     | 1760                                                    | 371                    | 591446                         |
| Maldives                       | 927                                                     | 426                    | 300                            |
| Mauritius                      | 3643                                                    | 1852                   | 1868                           |
| French Polynesia               | 1547                                                    | 4753                   | 4053                           |
| Solomon Islands                | 232                                                     | 1392                   | 28448                          |
| Sao Tome and Principe          | 71                                                      | 217                    | 1002                           |
| Seychelles                     | 757                                                     | 631                    | 494                            |
| Tonga                          | 117                                                     | 3102                   | 763                            |
| Trinidad and Tobago            | 6478                                                    | 13                     | 5159                           |
| Tuvalu                         | 13                                                      | 3227                   | 42                             |
| St. Vincent and the Grenadines | 271                                                     | 210                    | 398                            |
| Vanuatu                        | 159                                                     | 1787                   | 12358                          |
| Samoa                          | 275                                                     | 3807                   | 2853                           |



**Table S9: Overview on the datasets used. For all datasets global and regional (following the TDWG level 2 classification) coverage are given.** Additional number of continental and oceanic islands and information on the distance to the mainland distribution (in km) are provided.

|                              | <b>Vascular plants</b> | <b>Ants</b> | <b>Mammals</b> | <b>Reptiles</b> | <b>Birds</b> |
|------------------------------|------------------------|-------------|----------------|-----------------|--------------|
| No. islands                  | 108                    | 89          | 125            | 75              | 87           |
| Continental islands          | 11                     | 14          | 21             | 10              | 15           |
| Oceanic islands              | 97                     | 75          | 104            | 65              | 72           |
| Min. distance to mainland    | 6.20                   | 13.18       | 23.49          | 1.37            | 1.36         |
| Max. distance to mainland    | 5824.76                | 5710.06     | 5471.75        | 5471.75         | 5915.07      |
| Median distance to mainland  | 2652.56                | 927.45      | 743.60         | 788.14          | 2012.76      |
| Arabian Peninsula            | 0                      | 0           | 0              | 1               | 1            |
| Australia                    | 2                      | 0           | 6              | 0               | 0            |
| Brazil                       | 2                      | 1           | 0              | 1               | 1            |
| Caribbean                    | 18                     | 22          | 56             | 30              | 24           |
| Eastern Asia                 | 3                      | 3           | 0              | 1               | 3            |
| Macaronesia                  | 2                      | 2           | 9              | 2               | 2            |
| Malesia                      | 2                      | 8           | 2              | 3               | 2            |
| Mexico                       | 2                      | 2           | 1              | 1               | 0            |
| Middle Atlantic Ocean        | 2                      | 2           | 2              | 2               | 2            |
| New Zealand                  | 1                      | 1           | 0              | 0               | 1            |
| North-Central Pacific        | 3                      | 3           | 9              | 1               | 2            |
| Northeast Tropical Africa    | 18                     | 1           | 1              | 1               | 1            |
| Northwestern Pacific         | 1                      | 7           | 3              | 5               | 9            |
| Papuasias                    | 22                     | 2           | 3              | 1               | 1            |
| South-Central Pacific        | 19                     | 10          | 8              | 3               | 16           |
| Southwestern Pacific         | 2                      | 11          | 5              | 12              | 7            |
| West-Central Tropical Africa | 1                      | 1           | 1              | 3               | 2            |
| Western Indian Ocean         | 8                      | 11          | 5              | 7               | 12           |
| Western South America        | 1                      | 2           | 14             | 1               | 1            |

**Table S10 Correlation matrix for predictor variables**

|                             | <i>Island area</i> | <i>Elevational range</i> | <i>Distance to mainland</i> | <i>Mean annual temp</i> | <i>Annual prec. sum</i> | <i>Per-capita GDP</i> |
|-----------------------------|--------------------|--------------------------|-----------------------------|-------------------------|-------------------------|-----------------------|
| Plants                      |                    |                          |                             |                         |                         |                       |
| <i>Island area</i>          | 1.00               |                          |                             |                         |                         |                       |
| <i>Elevational range</i>    | 0.63               | 1.00                     |                             |                         |                         |                       |
| <i>Distance to mainland</i> | -0.51              | -0.27                    | 1.00                        |                         |                         |                       |
| <i>Mean annual temp</i>     | -0.36              | -0.38                    | 0.28                        | 1.00                    |                         |                       |
| <i>Annual prec. sum</i>     | 0.00               | 0.12                     | 0.26                        | 0.13                    | 1.00                    |                       |
| <i>Per-capita GDP</i>       | 0.28               | 0.34                     | -0.06                       | -0.17                   | 0.18                    | 1.00                  |
| Ants                        |                    |                          |                             |                         |                         |                       |
| <i>Island area</i>          | 1.00               |                          |                             |                         |                         |                       |
| <i>Elevational range</i>    | 0.72               | 1.00                     |                             |                         |                         |                       |
| <i>Distance to mainland</i> | -0.41              | -0.32                    | 1.00                        |                         |                         |                       |
| <i>Mean annual temp</i>     | -0.27              | -0.53                    | 0.00                        | 1.00                    |                         |                       |
| <i>Annual prec. sum</i>     | 0.17               | 0.13                     | 0.20                        | 0.13                    | 1.00                    |                       |
| <i>Per-capita GDP</i>       | -0.10              | 0.10                     | -0.01                       | -0.18                   | -0.13                   | 1.00                  |
| Mammals                     |                    |                          |                             |                         |                         |                       |
| <i>Island area</i>          | 1.00               |                          |                             |                         |                         |                       |
| <i>Elevational range</i>    | 0.61               | 1.00                     |                             |                         |                         |                       |
| <i>Distance to mainland</i> | -0.06              | 0.08                     | 1.00                        |                         |                         |                       |
| <i>Mean annual temp</i>     | -0.37              | -0.55                    | -0.19                       | 1.00                    |                         |                       |
| <i>Annual prec. sum</i>     | 0.09               | -0.01                    | 0.14                        | 0.32                    | 1.00                    |                       |
| <i>Per-capita GDP</i>       | 0.02               | -0.04                    | -0.03                       | -0.01                   | -0.02                   | 1.00                  |
| Reptiles                    |                    |                          |                             |                         |                         |                       |
| <i>Island area</i>          | 1.00               |                          |                             |                         |                         |                       |
| <i>Elevational range</i>    | 0.70               | 1.00                     |                             |                         |                         |                       |
| <i>Distance to mainland</i> | -0.31              | -0.26                    | 1.00                        |                         |                         |                       |
| <i>Mean annual temp</i>     | -0.45              | -0.56                    | 0.03                        | 1.00                    |                         |                       |
| <i>Annual prec. sum</i>     | 0.06               | 0.03                     | 0.43                        | 0.13                    | 1.00                    |                       |
| <i>Per-capita GDP</i>       | -0.23              | -0.07                    | 0.02                        | -0.11                   | -0.21                   | 1.00                  |
| Birds                       |                    |                          |                             |                         |                         |                       |

|                             |       |       |      |       |       |      |  |
|-----------------------------|-------|-------|------|-------|-------|------|--|
| <i>Island area</i>          | 1.00  |       |      |       |       |      |  |
| <i>Elevational range</i>    | 0.62  | 1.00  |      |       |       |      |  |
| <i>Distance to mainland</i> | -0.41 | -0.02 | 1.00 |       |       |      |  |
| <i>Mean annual temp</i>     | -0.31 | -0.41 | 0.06 | 1.00  |       |      |  |
| <i>Annual prec. sum</i>     | 0.02  | 0.10  | 0.36 | 0.14  | 1.00  |      |  |
| <i>Per-capita GDP</i>       | -0.12 | 0.02  | 0.21 | -0.03 | -0.05 | 1.00 |  |

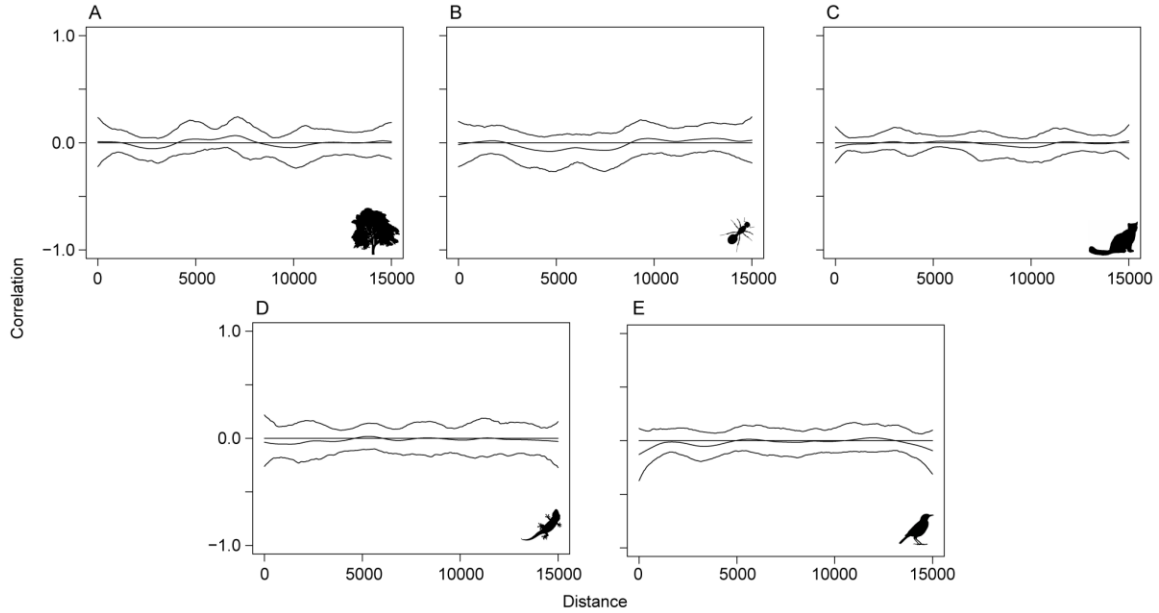

**Fig S1: Correlograms for assessing spatial autocorrelation in residuals of the generalized linear mixed effects models for alien species richness: A: vascular plants, B: ants, C: mammals, D: reptiles and E: birds.** Correlation= Moran's  $I$  (central line: observed value; upper and lower lines: upper and lower 95% confidence interval bounds, generated from 500 bootstrapped randomizations). Distance is given in kilometres.

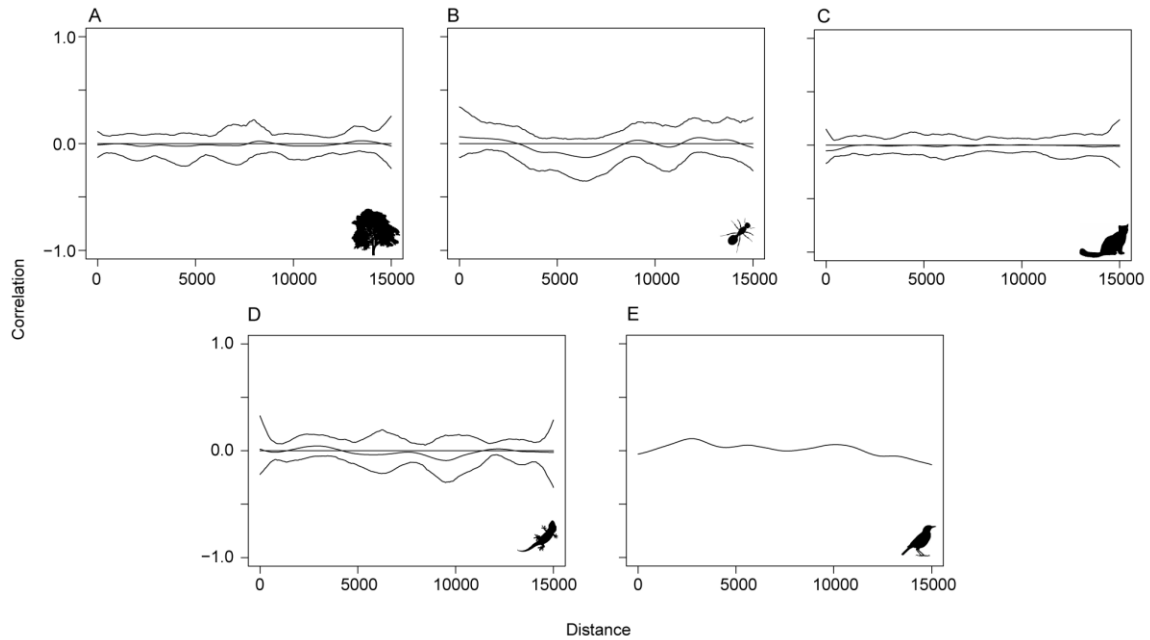

**Fig S2: Correlograms for assessing spatial autocorrelation in residuals of the generalized linear mixed effects models for native species richness: A: vascular plants, B: ants, C: mammals, D: reptiles.** Correlation= Moran's  $I$  (central line: observed value; upper and lower lines: upper and lower 95% confidence interval bounds, generated from 500 bootstrapped randomizations). Distance is given in kilometres.

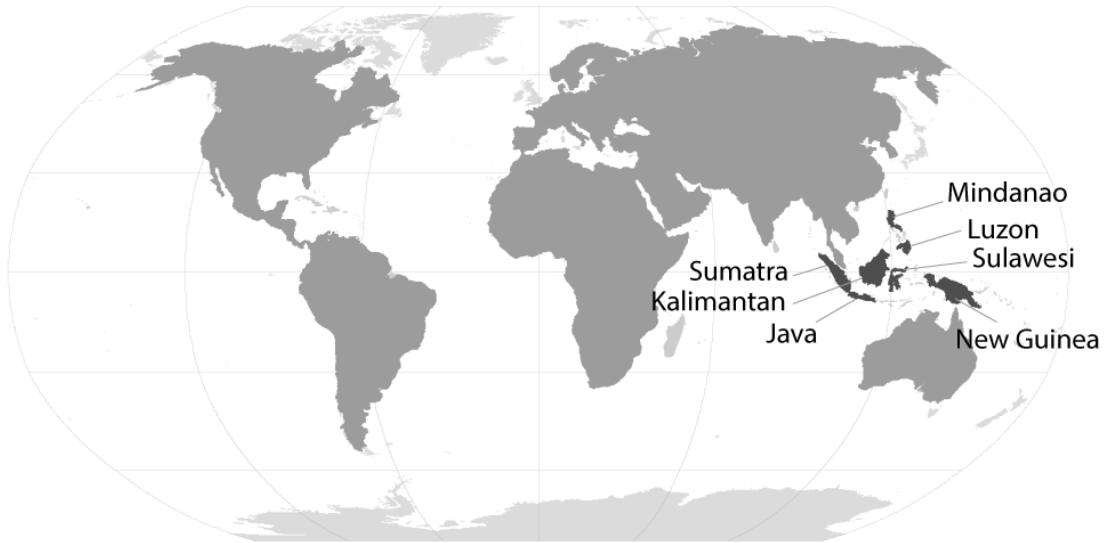

**Fig. S3: Overview of the main islands of the Malayan Archipelago.** The seven islands were additionally used together with the continental landmasses as alternative source pool regions for smaller islands of the region to test the robustness of the island isolation relationship for native and alien species richness.

## References

1. F. Dormann, C. *et al.* Methods to account for spatial autocorrelation in the analysis of species distributional data: A review. *Ecography*. **30**, 609–628 (2007).
2. Crase, B., Liedloff, A. C. & Wintle, B. a. A new method for dealing with residual spatial autocorrelation in species distribution models. *Ecography*. **35**, (2012).
3. Bivand, R., Hauke, J. & Kossowski, T. Computing the jacobian in gaussian spatial autoregressive models: An illustrated comparison of available methods. *Geogr. Anal.* **45**, 150–179 (2013).
4. Weigelt, P., Steinbauer, M. J., Cabral, J. S. & Kreft, H. Late Quaternary climate change shapes island biodiversity. *Nature* **532**, 99–102 (2016).
5. Bjornstad, O. N. ncf: Spatial Nonparametric Covariance Functions. R package version 1.1-7. (2016).
6. The Worldbank. Dataset: GDP per capita (current US\$). *World Bank national accounts data and OECD National Accounts data files* (2015).
7. Meiri, S. & Chapple, D. G. Biases in the current knowledge of threat status in lizards, and bridging the ‘assessment gap’. *Biol. Conserv.* **204**, 6–15 (2016).
8. United Nations Statistics Division. Dataset: Per capita GDP at current prices - US dollars. *National Accounts Estimates of Main Aggregates* (2015).
9. Gennaioli, N., La Porta, R., Lopez De Silanes, F. & Shleifer, A. Growth in regions. *J. Econ. Growth* **19**, 259–309 (2014).
10. Klein Goldewijk, K., Beusen, A., Van Dreht, G. & De Vos, M. The HYDE 3.1 spatially explicit database of human-induced global land-use change over the past 12,000 years. *Glob. Ecol. Biogeogr.* **20**, 73–86 (2011).
11. Hijmans, R. J., Cameron, S. E., Parra, J. L., Jones, P. G. & Jarvis, A. Very high resolution interpolated climate surfaces for global land areas. *Int. J. Climatol.* **25**, 1965–1978 (2005).
12. Farr, T. G. *et al.* The Shuttle Radar Topography Mission. *Rev. Geophys.* **45**, (2007).
13. Weigelt, P. & Kreft, H. Quantifying island isolation - insights from global patterns of insular plant species richness. *Ecography (Cop.)*. **36**, 417–429 (2013).
14. Brummitt, R. K. *World Geographical Scheme for Recording Plant Distributions Edition 2.* (2001). doi:10.1043/0363-6445-28.4.807
